# Supplementary material for: The Landscape of CAR-T Cell Clinical Trials against Solid Tumors—A Comprehensive Overview
Source: MDPI journal article supplement (doi:10.3390/cancers12092567), 2020-09-09
Supplement: s1 [file s1]

Supplemental Table S1: Characteristics of all clinical trials using CAR-T cells against solid tumors. Data was collected from clinicaltrials.gov and literature search on pubmed.ncbi.nlm.nih.gov.

| Antigen                         | Cancer                                                                                                                                                                                                                                                                                                                                                                            | CAR type /add-ons                                                                                                                                                                                                         | CAR transfer | Mode of injection                            | Number of cells                                                                                                                                                                                                                            | Phase         | Patient # /pretreatment /other drugs  | Outcome                    | NCT# /Status /PI                                                                                  | Ref   | Origin                                                                                                                                                                                                                  | Adverse events |
|---------------------------------|-----------------------------------------------------------------------------------------------------------------------------------------------------------------------------------------------------------------------------------------------------------------------------------------------------------------------------------------------------------------------------------|---------------------------------------------------------------------------------------------------------------------------------------------------------------------------------------------------------------------------|--------------|----------------------------------------------|--------------------------------------------------------------------------------------------------------------------------------------------------------------------------------------------------------------------------------------------|---------------|---------------------------------------|----------------------------|---------------------------------------------------------------------------------------------------|-------|-------------------------------------------------------------------------------------------------------------------------------------------------------------------------------------------------------------------------|----------------|
| AFP (alpha feto-protein)/HLA-A2 | HCC                                                                                                                                                                                                                                                                                                                                                                               | *ET1402L1-CART<br>*Human antibody domain against the anti-HLA-A02/AFP complex<br>*scFv-CD28/CD3ζ                                                                                                                          | lentiviral   | iv, iha                                      | dose escalation                                                                                                                                                                                                                            | phase 1       | *est. enrollment: 18                  | 1/6 CR, 2/6 PR             | NCT03349255; Terminated (Will study new T-cell construct for the same indication); PI: Qibin Song | [158] | Renmin Hospital of Wuhan University, China                                                                                                                                                                              |                |
| AFPpeptide/HLA-A2               | *HCC<br>*(metastatic) Liver cancer                                                                                                                                                                                                                                                                                                                                                | *2nd gen. ARTEMISTM receptor engineered with a human antibody domain against the anti-HLA-A02/AFP complex                                                                                                                 | lentiviral   | iv, it, iha                                  | dose escalation                                                                                                                                                                                                                            | early phase 1 | *est. enrollment: 27                  |                            | NCT03888859; recruiting<br>PI: Chang Liu                                                          |       | First Affiliated Hospital Xi'an Jiaotong University, China                                                                                                                                                              |                |
| B7-H3                           | *Recurrent glioblastoma<br>*Refractory glioblastoma                                                                                                                                                                                                                                                                                                                               | ?                                                                                                                                                                                                                         | retroviral   | it, intracerebroventricular                  | ?                                                                                                                                                                                                                                          | phase 1/2     | *est. enrollment: 40<br>*Temozolomide |                            | NCT04077866; recruiting;<br>PI: ?                                                                 |       | *Second Affiliated Hospital of Zhejiang University<br>*School of Medicine, Hangzhou, Zhejiang, China<br>*Huzhou Central Hospital, Huzhou, Zhejiang, China<br>*Ningbo Yinzhou People's Hospital, Ningbo, Zhejiang, China |                |
| B7-H3                           | *Central nervous system tumor<br>*Diffuse intrinsic pontine glioma<br>*Diffuse midline glioma<br>*Ependymoma<br>*Medulloblastoma<br>*Childhood germ cell tumor<br>*Atypical teratoid/rhabdoid tumor<br>*Primitive neuroectodermal tumor<br>*Choroid plexus carcinoma<br>*Pineoblastoma<br>*Childhood glioma                                                                       | *B7H3-specific 2nd gen. CAR<br>*EGFRt                                                                                                                                                                                     | lentiviral   | tumor resection cavity or ventricular system | ?                                                                                                                                                                                                                                          | phase 1       | est. enrollment: 70                   |                            | NCT04185038; recruiting;<br>PI: Nick Vitanza                                                      |       | Seattle Children's Hospital, Seattle, Washington, USA                                                                                                                                                                   |                |
| B7-H3                           | *Pediatric solid tumor<br>*Germ cell tumor<br>*Retinoblastoma<br>*Hepatoblastoma<br>*Wilms tumor<br>*Rhabdoid tumor<br>*Carcinoma<br>*Osteosarcoma<br>*Ewing sarcoma<br>*Rhabdomyosarcoma<br>*Synovial sarcoma<br>*Clear cell sarcoma<br>*Malignant peripheral nerve sheath tumors<br>*Desmoplastic small round cell tumor<br>*Soft tissue sarcoma<br>*Neuroblastoma<br>*Melanoma | Arm A:<br>*scFv-4-1BB/CD3ζ specific for B7-H3<br>*EGFRt for depletion with cetuximab<br>Arm B:<br>*scFv-4-1BB/CD3ζ specific for B7-H3 and<br>*scFv-4-1BB/CD3ζ specific for CD19<br>*Her2tG for depletion with trastuzumab | lentiviral   | ?                                            | ?                                                                                                                                                                                                                                          | phase 1       | est. enrollment: 68                   |                            | NCT04483778; recruiting;<br>PI: Navin Pinto                                                       |       | Seattle Children's Hospital, USA                                                                                                                                                                                        |                |
| B7-H3                           | r/r glioblastoma                                                                                                                                                                                                                                                                                                                                                                  | ?                                                                                                                                                                                                                         | retroviral   | it, intracerebroventricular                  | 3 infusions, 1-2 weeks interval                                                                                                                                                                                                            | phase 1       | *est. enrollment: 12<br>*Temozolomide |                            | NCT04385173; recruiting;<br>PI:?                                                                  |       | Second Affiliated Hospital, School of Medicine, Zhejiang University, China                                                                                                                                              |                |
| B7-H3 (CD276)                   | B7-H3 pos. solid tumor                                                                                                                                                                                                                                                                                                                                                            | 4SCAR-276                                                                                                                                                                                                                 | lentiviral   | ?                                            | approx. 10 <sup>6</sup> CART cells/kg                                                                                                                                                                                                      | phase 1/2     | *est. enrollment: 100<br>*cy+flu      |                            | NCT04432649; recruiting;<br>PI: ?                                                                 |       | *Sun Yat-sen University<br>*Shenzhen Children's Hospital<br>*Shenzhen Geno-Immune Medical Institute , China                                                                                                             |                |
| CD20                            | Unresectable stage III or IV melanoma                                                                                                                                                                                                                                                                                                                                             | MB-CART20.1                                                                                                                                                                                                               | lentiviral   | iv                                           | *MTD, 3+3 design with 1 log dose increments, maximum 3 dose levels<br>*level 1: 3+3 patients 1x10 <sup>5</sup> CART20.1/kg<br>*level 2: 3+3 patients 1x10 <sup>6</sup> CART20.1/kg<br>*level 3: 3+3 patients 1x10 <sup>7</sup> CART20.1/kg | phase 1       | *est. enrollment: 15<br>*cy+flu       | with 1 log dose increments | NCT03893019; recruiting;<br>PI: Peter Borchmann                                                   |       | *Miltenyi biotec; Bergisch Gladbach, Germany<br>* Universitätsklinikum Köln, Germany                                                                                                                                    |                |
| CD44v6                          | Multiple cancers including - but not limited to -<br>*stomach cancer,<br>*breast cancer,<br>*prostate cancer                                                                                                                                                                                                                                                                      | 4SCAR                                                                                                                                                                                                                     | lentiviral   | iv                                           | 10 <sup>6</sup> cells/kg                                                                                                                                                                                                                   | phase 1/2     | *est. enrollment: 100                 |                            | NCT04427449; recruiting;<br>PI: ?                                                                 |       | *Shenzhen Hospital of Southern Medical University<br>*The Seventh Affiliated Hospital, Sun Yat-Sen University<br>*Shenzhen Children's HospitalShenzhen Geno-Immune Medical Institute, China                             |                |

| Antigen                                                                    | Cancer                                                                                                                                                                    | CAR type /add-ons                                                                                                                                      | CAR transfer          | Mode of injection | Number of cells                                                                                                                            | Phase         | Patient # /pretreatment /other drugs                                                                                                                                             | Outcome                                                                                                                                                                                                                                                                                                                                                                                                    | NCT# /Status /PI                                                                                      | Ref       | Origin                                                                           | Adverse events                                                                                                                                                                                                                                                                                                                                                                                                                                                                                                                             |
|----------------------------------------------------------------------------|---------------------------------------------------------------------------------------------------------------------------------------------------------------------------|--------------------------------------------------------------------------------------------------------------------------------------------------------|-----------------------|-------------------|--------------------------------------------------------------------------------------------------------------------------------------------|---------------|----------------------------------------------------------------------------------------------------------------------------------------------------------------------------------|------------------------------------------------------------------------------------------------------------------------------------------------------------------------------------------------------------------------------------------------------------------------------------------------------------------------------------------------------------------------------------------------------------|-------------------------------------------------------------------------------------------------------|-----------|----------------------------------------------------------------------------------|--------------------------------------------------------------------------------------------------------------------------------------------------------------------------------------------------------------------------------------------------------------------------------------------------------------------------------------------------------------------------------------------------------------------------------------------------------------------------------------------------------------------------------------------|
| CD70                                                                       | CD70-expressing cancers (e.g. *renal carcinoma; *pancreatic cancer, *breast cancer, *melanoma, *ovarian cancer)                                                           | No scFv against CD70, but CD27 (i.e. CD70 ligand) as binding moiety                                                                                    | retroviral            | iv                | MTD                                                                                                                                        | phase 1/2     | *est. enrollment: 113<br>*cy+flu<br>*high dose IL-2 (Aldesleukin; 720,000IU/kg)                                                                                                  |                                                                                                                                                                                                                                                                                                                                                                                                            | NCT02830724; recruiting; PI: James Yang                                                               | [147,150] | NCI, NIH, USA                                                                    |                                                                                                                                                                                                                                                                                                                                                                                                                                                                                                                                            |
| CD70                                                                       | Renal cell carcinoma                                                                                                                                                      | *Allogeneic CRISPR-Cas9-engineered T cells (CTX130)<br>*β2M knockout<br>*TRAC knockout by insertion of CAR gene (i.e. TCR knockout and CAR expression) | CRISPR-Cas9           | iv                | dose escalation                                                                                                                            | phase 1       | *est. enrollment: 95<br>*lymphodepleting chemotherapy                                                                                                                            |                                                                                                                                                                                                                                                                                                                                                                                                            | NCT04438083; recruiting; PI: Matthias Will                                                            |           | *CRISPR Therapeutics AG<br>*Research Site 1: Melbourne, Victoria, Australia      |                                                                                                                                                                                                                                                                                                                                                                                                                                                                                                                                            |
| CD133                                                                      | Relapsed and/or chemotherapy refractory advanced malinancies<br>*liver, *pancreatic, *brain, *breast, *ovarian, *colorectal cancer, *acute myeloid and lymphoid leukemias | Comparison:<br>*scFv-4-1BB/CD3ζ<br>*scFv-CD3ζ                                                                                                          | retroviral            | iv                | dose escalation, (3+3 approach)<br>Mean: 1.43x10 <sup>9</sup> /kg                                                                          | phase 1       | *est. enrollment: 20                                                                                                                                                             | 3/23 PR, 14/23 SD                                                                                                                                                                                                                                                                                                                                                                                          | NCT02541370; completed; PI: Han Weidong                                                               | [39,227]  | Chinese PLA General Hospital; China                                              | *CD133: an intermittent upper abdominal dull pain, chills, fever, and rapidly deteriorative grade 3 systemic subcutaneous hemorrhages and congestive rashes together with serum cytokine release<br><br>*On-target/off-tumor toxicity: liver enzymes increase (aEGFR), rash and mucositis (aCD133)                                                                                                                                                                                                                                         |
| CD147 (EMMPRIN (extracellular matrix metallopro-teinase inducer), Basigin) | Recurrent malignant glioma                                                                                                                                                | ?                                                                                                                                                      | ?                     | ic                | MTD, 3 doses, 1-week intervals, 3+3                                                                                                        | early phase 1 | *est. enrollment: 31                                                                                                                                                             |                                                                                                                                                                                                                                                                                                                                                                                                            | NCT04045847; recruiting; PI: not provided                                                             |           | Xijing Hospital, China                                                           |                                                                                                                                                                                                                                                                                                                                                                                                                                                                                                                                            |
| CD147 (EMMPRIN (extracellular matrix metallopro-teinase inducer), Basigin) | Very advanced HCC                                                                                                                                                         | ?                                                                                                                                                      | ?                     | iha               | MTD, 3 doses, 1-week intervals                                                                                                             | phase 1       | est. enrollment: 34                                                                                                                                                              |                                                                                                                                                                                                                                                                                                                                                                                                            | NCT03993743; recruiting; PI: ?                                                                        |           | Fourth Military Medical University; Xijing Hospital, China                       |                                                                                                                                                                                                                                                                                                                                                                                                                                                                                                                                            |
| CD171 (L1CAM)                                                              | Neuroblastoma                                                                                                                                                             | *scFv-4-1BB/CD3ζ<br>*scFv-CD28/4-1BB/CD3ζ<br>*EGFRt                                                                                                    | lentiviral            | iv                | 1x10 <sup>6</sup> cells/kg, 5x10 <sup>6</sup> cells/kg, 1x10 <sup>7</sup> cells/kg, 5x10 <sup>7</sup> cells/kg, 1x10 <sup>8</sup> cells/kg | phase 1       | *est. enrollment: 40<br>*lymphodepletion                                                                                                                                         |                                                                                                                                                                                                                                                                                                                                                                                                            | NCT02311621; recruiting; PI: Julie Park                                                               | [133]     | Seattle Children's Hospital, USA                                                 |                                                                                                                                                                                                                                                                                                                                                                                                                                                                                                                                            |
| CD171 (L1CAM)                                                              | Neuroblastoma                                                                                                                                                             | *CE7R CAR<br>*scFv-CD3ζ<br>*Genetically-modified autologous CD8+ T-cell clones<br>*HyTK                                                                | genetically modified? | iv                | 1x10 <sup>8</sup> -1.1x10 <sup>9</sup> /m <sup>2</sup> (split dose; 2-3 times infusions 14 days apart)                                     | phase 1       | *IL-2<br>*chemotherapy regimen that may consist of one of the following: cyclophosphamide and topotecan; ifosfamide, carboplatin, and etoposide; or another chemotherapy regimen | *1/6 PR and 5/6 PD 56 days after adoptive therapy<br>*But all patients died of disease ultimately with only one achieved a relatively long survival.                                                                                                                                                                                                                                                       | NCT00006480; completed; PI: Julie Park                                                                | [211]     | *Fred Hutchinson Cancer Research Center<br>*National Cancer Institute (NCI), USA | *Grade 3 lymphopenia, neutropenia, low hemoglobinand bacteremia caused by 10 <sup>9</sup> /m <sup>2</sup> CAR-T cells<br>*Grade 3 pneumonitis for one patient, which was associated with 10 <sup>9</sup> /m <sup>2</sup> CAR-T cells<br>*No grade 4 or 5 adverse event was found<br>*On-target/off-tumor toxicity: lymphopenia, neutropenia, anemia, pneumonitis                                                                                                                                                                           |
| CEA                                                                        | Pancreatic carcinoma with CEA+ liver metastases                                                                                                                           | CAR2 anti-CEA CAR                                                                                                                                      | ?                     | iha               | *weekly 3 doses of CAR-T cells in each 28-day cycle, max 3 cycles<br>*1x10 <sup>10</sup> cell per dose                                     | phase 1b      | *est. enrollment: 6<br>*low dose systemic IL-2                                                                                                                                   |                                                                                                                                                                                                                                                                                                                                                                                                            | NCT03818165; active, not recruiting; PI: Steven C Katz                                                |           | Roger Williams Medical Center, USA                                               |                                                                                                                                                                                                                                                                                                                                                                                                                                                                                                                                            |
| CEA                                                                        | *Gastric adenocarcinoma<br>*colorectal adenocarcinoma<br>*lung adenocarcinoma<br>*Solid tumors                                                                            | scFv-CD28/CD3ζ                                                                                                                                         | retroviral            | iv                | ?                                                                                                                                          | phase 2       | *est. enrollment: 48<br>*IL-2                                                                                                                                                    |                                                                                                                                                                                                                                                                                                                                                                                                            | NCT01723306; suspended (funding); PI: Richard P Junghans                                              |           | Roger Williams Medical Center, USA                                               |                                                                                                                                                                                                                                                                                                                                                                                                                                                                                                                                            |
| CEA                                                                        | Adenocarcinomas                                                                                                                                                           | *scFv-CD3ζ<br>*murine scFv                                                                                                                             | ?                     | ?                 | dose escalation                                                                                                                            | phase 1       | ?                                                                                                                                                                                |                                                                                                                                                                                                                                                                                                                                                                                                            | NCT00004178; completed; PI: Richard P Junghans                                                        |           | *Beth Israel Deaconess Medical Center<br>*Roger Williams Medical Center, USA     |                                                                                                                                                                                                                                                                                                                                                                                                                                                                                                                                            |
| CEA                                                                        | Metastatic breast cancer                                                                                                                                                  | scFv-CD28/CD3ζ                                                                                                                                         | retroviral            | iv                | 10 <sup>9</sup> , 10 <sup>10</sup> , 10 <sup>11</sup>                                                                                      | phase 1       | *est. enrollment: 26<br>*with/without IL-2<br>*no preconditioning                                                                                                                |                                                                                                                                                                                                                                                                                                                                                                                                            | NCT00673829; suspended (funding); PI: Richard P Junghans                                              |           | Roger Williams Medical Center, USA                                               |                                                                                                                                                                                                                                                                                                                                                                                                                                                                                                                                            |
| CEA                                                                        | CEA+ liver metastases                                                                                                                                                     | *scFv-CD28/CD3ζ<br>*scFv based on hMN14 (humanized)<br>*CD8 hinge                                                                                      | retroviral            | iha               | *Inpatient dose escalation<br>*10 <sup>8</sup> , 10 <sup>9</sup> , 10 <sup>10</sup><br>*Three infusions over the course of 6 weeks         | phase 1       | *actual enrollment: 8<br>*no preconditioning                                                                                                                                     | *Katz et al., 2015:1/6 SD, 5/6 PD and DOD (however decrease in CEA and 4/6 had necrosis of liver lesions)<br>*Of 6 patients 3 got dose escalation 10 <sup>8</sup> , 10 <sup>9</sup> , 10 <sup>10</sup> , without support; the other three got 3x10 <sup>10</sup> with systemic IL-2 support.<br>*Book chapter: no systemic toxicity; minority of patients showed increased survival or decreased serum CEA | NCT01373047; completed; PI: Steven C Katz                                                             | [51-53]   | Roger Williams Medical Center, USA                                               | *Grade 3 fever and tachycardia (1 patient), associated to high-dose IL-2 administration.<br>*Grade 1/2 transient elevations of alkaline phosphatase, total bilirubin and aspartate aminotransferase levels observed in all patients.<br>*Mylagias, abdomnal pain, nausea, emesis, abdominal wall muscle spasm, ALT↑, AST↑, ascites, edema, thrombo-cytopenia, leukopenia, dyspnea, pleural effusion, anorexia, rash, subscapular liver hematoma,eosinophilia, chills, diarrhea, dehydration, colitis.<br>*On-target/off-tumor toxicity: no |
| CEA                                                                        | *Pancreatic cancer<br>*liver metastases                                                                                                                                   | ?                                                                                                                                                      | ?                     | iha               |                                                                                                                                            | phase 2b      | *est. enrollment: 167<br>*CAR-T w/ chemotherapy (gemcitabine/nab paclitaxel, NLIR+FU/FA, Capecitabine) vs. chemotherapy alone<br>* low dose IL-2                                 |                                                                                                                                                                                                                                                                                                                                                                                                            | NCT04037241; not yet recruiting; PI: not provided                                                     |           | Sorrento Therapeutics, Inc., USA                                                 |                                                                                                                                                                                                                                                                                                                                                                                                                                                                                                                                            |
| CEA                                                                        | Colorectal carcinoma                                                                                                                                                      | scFv-CD28/CD3ζ                                                                                                                                         | retroviral            | iv                | 10 <sup>9</sup> , 10 <sup>10</sup> , 10 <sup>11</sup>                                                                                      | phase 1       | *actual enrollment: 1<br>*no preconditioning                                                                                                                                     |                                                                                                                                                                                                                                                                                                                                                                                                            | NCT00673322.; terminated (this study will be incorporated into another study); PI: Richard P Junghans |           | Roger Williams Medical Center, USA                                               |                                                                                                                                                                                                                                                                                                                                                                                                                                                                                                                                            |

| Antigen                                 | Cancer                                                                                                                      | CAR type /add-ons                                                                                              | CAR transfer      | Mode of injection                          | Number of cells                                                                                                                                                                                                                                                                                                 | Phase     | Patient # /pretreatment /other drugs                                                        | Outcome                                                                                                                                                                                                                                                                                                    | NCT# /Status /PI                                                                                 | Ref     | Origin                                                                        | Adverse events                                                                                                                                                                                                                                                                                                                                                                                                                                                         |
|-----------------------------------------|-----------------------------------------------------------------------------------------------------------------------------|----------------------------------------------------------------------------------------------------------------|-------------------|--------------------------------------------|-----------------------------------------------------------------------------------------------------------------------------------------------------------------------------------------------------------------------------------------------------------------------------------------------------------------|-----------|---------------------------------------------------------------------------------------------|------------------------------------------------------------------------------------------------------------------------------------------------------------------------------------------------------------------------------------------------------------------------------------------------------------|--------------------------------------------------------------------------------------------------|---------|-------------------------------------------------------------------------------|------------------------------------------------------------------------------------------------------------------------------------------------------------------------------------------------------------------------------------------------------------------------------------------------------------------------------------------------------------------------------------------------------------------------------------------------------------------------|
| CEA                                     | Gastric cancer                                                                                                              | scFv-CD28/CD3ζ                                                                                                 | ?                 | ?                                          | ?                                                                                                                                                                                                                                                                                                               | phase 1   | actual enrollment: 0                                                                        |                                                                                                                                                                                                                                                                                                            | NCT00429078; Withdrawn (low accrual); PI: Richard P Junghans                                     |         | Roger Williams Medical Center, USA                                            |                                                                                                                                                                                                                                                                                                                                                                                                                                                                        |
| CEA                                     | CEA-positive cancer: *lung, *colorectal, *gastric, *breast, *pancreatic cancer                                              | *scFv-CD28/CD3ζ<br>*scFv based on BW431/26 (humanized)<br>*IgG4 hinge                                          | lentiviral        | iv                                         | dose escalation, five escalating dose levels (1x10 <sup>5</sup> -1x10 <sup>6</sup> /CAR+ cells/kg), split doses (10, 30, and 60% of the total cell dose)                                                                                                                                                        | phase 1   | *est. enrollment: 75<br>*cy+flu                                                             | *2/10PD, 7/10 SD, 1/10 not evaluated<br>*Decline of serum CEA level in most patients<br>*High dose well tolerated (no colitis, no respiratory toxicity)                                                                                                                                                    | NCT02349724; unknown; PI: Cheng Qian                                                             | [54]    | Southwest Hospital, China                                                     | *Fever<br>*On-target/off-tumor toxicity: no                                                                                                                                                                                                                                                                                                                                                                                                                            |
| CEA                                     | CEA-expressing adenocarcinoma peritoneal metastases or malignant ascites: *colorectal, *gastric, *breast, *pancreas         | ?                                                                                                              | ?                 | ip                                         | MTD, dose escalation one dose per patient                                                                                                                                                                                                                                                                       | phase 1   | est. enrollment: 18                                                                         |                                                                                                                                                                                                                                                                                                            | NCT03682744; active, not recruiting; PI: Steven Katz                                             |         | Roger WilliamsMedical Center, USA                                             |                                                                                                                                                                                                                                                                                                                                                                                                                                                                        |
| CEA                                     | Liver metastases                                                                                                            | scFv-CD28/CD3ζ                                                                                                 | retroviral        | iha in combination with Sir-spheres (SIRT) | fixed dose; 3 infusions over 6 weeks                                                                                                                                                                                                                                                                            | phase 1b  | *actual enrollment: 8<br>*no lymphodepletion<br>*low dose IL-2                              | *Well tolerated<br>*Biologic responses were demonstrated<br>*AACR 2017: 3/6 SD, median OS 6.9 months, 1 metabolic CR                                                                                                                                                                                       | NCT02416466; completed; PI: Steven Katz                                                          | [55,56] | Roger Williams Medical Center, USA                                            | On-target/off-tumor toxicity: no                                                                                                                                                                                                                                                                                                                                                                                                                                       |
| CEA                                     | *CEA-expressing liver metastases<br>*Pancreas cancer                                                                        | ?                                                                                                              | ?                 | iha or pv                                  | *Fixed dose<br>*3 doses per patient with 1 week intervals                                                                                                                                                                                                                                                       | phase 1b  | *actual enrollment: 5<br>*low dose IL-2                                                     | *n=5 (4 pancreatic cancer). 2 with no viable liver metastases by PET scan<br>*Median OS post-treatment 8.3 months                                                                                                                                                                                          | NCT02850536; active, not recruiting; PI: Steven Katz and Richard Schulick                        | [57]    | *Roger WilliamsMedical Center<br>*University of Colorado, Denver, USA         |                                                                                                                                                                                                                                                                                                                                                                                                                                                                        |
| CEA                                     | r/r CEA+ cancer: *solid tumor, *lung, *colorectal, *liver, *pancreatic, *gastric, *breast                                   | ?                                                                                                              | ?                 | iv                                         | 1-3 times                                                                                                                                                                                                                                                                                                       | phase 1/2 | est. enrollment: 40                                                                         |                                                                                                                                                                                                                                                                                                            | NCT04348643 recruiting PI: Zhi Yang and Yingzi Zhang                                             |         | Chongqing Precision Biotech Co., China                                        |                                                                                                                                                                                                                                                                                                                                                                                                                                                                        |
| CEA                                     | *Breast, *colorectal, *gastric, *lung, *ovarian, *pancreatic cancer, *unspecified adult solid tumor                         | *scFv-CD3ζ<br>*scFv based on MFE23 (murine)                                                                    | retroviral        | iv                                         | dose escalation 1x10 <sup>5</sup> -5x10 <sup>10</sup>                                                                                                                                                                                                                                                           | phase 1   | *actual enrollment: 14<br>*Cohort 1-3: only flu<br>*Cohort 4: cy+flu<br>*Aldesleukin (IL-2) | *7/14 SD, 7/14 PD<br>*Transient reduction in serum CEA in cohort 4, no colitis, transient, acute respiratory toxicity                                                                                                                                                                                      | NCT01212887; Terminated (due to safety concerns and lack of efficacy); PI: Robert E. Hawkins, MD | [58]    | *Cancer Research UK<br>*Christie Hospital Manchester, England, United Kingdom | *Pelvic pain, neutropaenia, general deterioration, hypocalcaemia, leukopenia, hypophosphataemia, lymphopenia, left side pain, abdominal pain, anaemia, thrombocytopenia, vomiting, hypotension, hyperbilirubinaemia, hyoalbuminaemia, epistaxis, hyponatraemia, intermittent pyrexia, haematemesis, jaundice, neutropenic sepsis, intermittent anaemia, intermittent increased respiratory rate<br>*On-target/off-tumor toxicity: transient acute respiratory toxicity |
| claudin 18.2                            | Gastric cancer                                                                                                              | LCAR-C18S cells                                                                                                | ?                 | infusion?                                  | *MTD/ RP2D regimen finding<br>*single dose                                                                                                                                                                                                                                                                      | phase 1   | *est. enrollment: 34<br>*cy+flu                                                             |                                                                                                                                                                                                                                                                                                            | NCT04467853; not yet recruiting; PI: Jin Li                                                      |         | *Shanghai East Hospital *Nanjing Legend Biotech Co., China                    |                                                                                                                                                                                                                                                                                                                                                                                                                                                                        |
| claudin 18.2                            | *Advanced gastric cancer<br>*Pancreatic ductal adenocarcinoma                                                               | LCAR-C182A                                                                                                     | ?                 | iv                                         | ?                                                                                                                                                                                                                                                                                                               | phase 1   | *est. enrollment: 18<br>*cy+flu                                                             |                                                                                                                                                                                                                                                                                                            | NCT03890198; recruiting; PI: Enxiao Li                                                           |         | First Affiliated Hospital Xi'an Jiaotong University, China                    |                                                                                                                                                                                                                                                                                                                                                                                                                                                                        |
| claudin 18.2 (CLD18)                    | *Advanced gastric adenocarcinoma<br>*Pancreatic adenocarcinoma                                                              | scFv-CD28/CD3ζ                                                                                                 | lentiviral        | iv                                         | dose escalation, multiple infusions                                                                                                                                                                                                                                                                             | phase 1   | *est. enrollment: 24<br>*Lymphodepletion                                                    | 1/12 CR, 3/12 PR, 5/12 SD                                                                                                                                                                                                                                                                                  | NCT03159819; recruiting; PI: Xianbao Zhan                                                        | [228]   | Shanghai hospital, China                                                      |                                                                                                                                                                                                                                                                                                                                                                                                                                                                        |
| claudin 18.2                            | Advanced solid tumors; claudin 18.2 positive                                                                                | humanized CAR                                                                                                  | ?                 | ?                                          | MTD                                                                                                                                                                                                                                                                                                             | phase 1   | *est. enrollment: 15<br>*cy+flu                                                             |                                                                                                                                                                                                                                                                                                            | NCT03874897; recruiting; PI: Lin Shen                                                            |         | Beijing Cancer Hospital, China                                                |                                                                                                                                                                                                                                                                                                                                                                                                                                                                        |
| claudin 18.2                            | *Gastric adenocarcinoma<br>*Pancreatic adenocarcinoma                                                                       | CT041                                                                                                          | ?                 | ?                                          | Part A: dose escalation (3+3)<br>Part B: expansion cohort                                                                                                                                                                                                                                                       | phase 1b  | *est. enrollment: 30<br>*Preconditioning                                                    |                                                                                                                                                                                                                                                                                                            | NCT04404595; not yet recruiting; PI: ?                                                           |         | Carsgen Therapeutics, Ltd., USA                                               |                                                                                                                                                                                                                                                                                                                                                                                                                                                                        |
| Ligand(s) of chlorotoxin                | *Recurrent glioblastoma<br>*Recurrent malignant glioma<br>*Recurrent WHO grade II glioma<br>*Recurrent WHO grade III glioma | *Chlorotoxin (EQ)-CD28/CD3ζ (no scFv, peptide-bearing CAR, with chlorotoxin peptide extracellularly)<br>*CD19t | ?                 | infusion?                                  | Patients receive CAR-T lymphocytes via dual delivery starting on day 0 for 3 weekly cycles over 21 days. Each treatment cycle begins with one or two CAR-T cell infusions (one at each catheter site) and lasts for 1 week. Treatment continues in the absence of disease progression or unacceptable toxicity. | phase 1   | est. enrollment: 36                                                                         |                                                                                                                                                                                                                                                                                                            | NCT04214392; recruiting; PI: Behnam Badie                                                        | [147]   | *City of Hope Medical Center; *National Cancer Institute (NCI), USA           |                                                                                                                                                                                                                                                                                                                                                                                                                                                                        |
| c-Met/hepatocyte growth factor receptor | *Metastatic breast cancer<br>*TNBC                                                                                          | *scFv-4-1BB/CD3ζ<br>*scFv based on Onartuzumab                                                                 | mRNA-transfection | it (cutaneous or lymph node mets)          | 1x 3x10 <sup>7</sup> or 1x 3x10 <sup>8</sup>                                                                                                                                                                                                                                                                    | phase 1   | *n=6 (3 each cohort)<br>*no pretreatment                                                    | *mRNA c-Met-CAR-T cell injections were well tolerated<br>*No drug-related adverse effects greater than grade 1<br>*Extensive tumor necrosis at injection site<br>*Loss of c-Met immunoreactivity<br>*Surrounded by macrophages at the leading edges and within necrotic zones<br>*2/6 PD, 1/6 SD, 3/6 died | NCT01837602; completed; PI: Tchou                                                                | [222]   | Upenn, USA                                                                    | *No side effects<br>*On-target/off-tumor toxicity: no                                                                                                                                                                                                                                                                                                                                                                                                                  |

| Antigen                                 | Cancer                                                                                                                                                                                                                                                                                                     | CAR type /add-ons                                                                           | CAR transfer      | Mode of injection | Number of cells                                                                                                                                                                                                                                                                                                                                   | Phase         | Patient # /pretreatment /other drugs                                                                                                                                                                                                                                                                                                                | Outcome                                                                                                                            | NCT# /Status /PI                                                                                                                                           | Ref          | Origin                                                                    | Adverse events                                                                                                                                                                                                                                                                                                                                                                                                                                                                                                                                                                                                                                                                                                                                                                                                                                |
|-----------------------------------------|------------------------------------------------------------------------------------------------------------------------------------------------------------------------------------------------------------------------------------------------------------------------------------------------------------|---------------------------------------------------------------------------------------------|-------------------|-------------------|---------------------------------------------------------------------------------------------------------------------------------------------------------------------------------------------------------------------------------------------------------------------------------------------------------------------------------------------------|---------------|-----------------------------------------------------------------------------------------------------------------------------------------------------------------------------------------------------------------------------------------------------------------------------------------------------------------------------------------------------|------------------------------------------------------------------------------------------------------------------------------------|------------------------------------------------------------------------------------------------------------------------------------------------------------|--------------|---------------------------------------------------------------------------|-----------------------------------------------------------------------------------------------------------------------------------------------------------------------------------------------------------------------------------------------------------------------------------------------------------------------------------------------------------------------------------------------------------------------------------------------------------------------------------------------------------------------------------------------------------------------------------------------------------------------------------------------------------------------------------------------------------------------------------------------------------------------------------------------------------------------------------------------|
| c-Met/hepatocyte growth factor receptor | *Advanced breast carcinoma<br>*Advanced melanoma                                                                                                                                                                                                                                                           | scFv-4-1BB/CD3ζ                                                                             | mRNA-transfection | iv                | *Up to 6 doses over a 2 week period<br>*Each dose is 1x10 <sup>8</sup> cells                                                                                                                                                                                                                                                                      | early phase 1 | *est. enrollment: 10 patients<br>*no lymphodepletion                                                                                                                                                                                                                                                                                                |                                                                                                                                    | NCT03060356; terminated (halt in funding); PI: Mitchell                                                                                                    |              | Upenn, USA                                                                |                                                                                                                                                                                                                                                                                                                                                                                                                                                                                                                                                                                                                                                                                                                                                                                                                                               |
| DLL3 (delta-like protein 3)             | Relapsed/refractory small cell lung cancer (SCLC)                                                                                                                                                                                                                                                          | AMG 119                                                                                     | ?                 | iv                | single dose                                                                                                                                                                                                                                                                                                                                       | phase 1       | est. enrollment: 41                                                                                                                                                                                                                                                                                                                                 |                                                                                                                                    | NCT03392064; active, not recruiting; PI: MD Amgen                                                                                                          |              | Amgen, USA                                                                |                                                                                                                                                                                                                                                                                                                                                                                                                                                                                                                                                                                                                                                                                                                                                                                                                                               |
| EGFR                                    | *Non-small cell lung cancer,<br>*colorectal cancer with liver metastasis<br>*Chemotherapy resistant or relapsed:<br>*ovary cancer,<br>*lung cancer,<br>*cholangiocarcinoma,<br>*gall bladder carcinoma,<br>*pancreatic cancer,<br>*renal carcinoma and<br>*other relapsed/ metastatic/ unresectable tumors | *scFv-4-1BB/CD3ζ<br>*scFv based on E10                                                      | lentiviral        | iv                | *1 to 3 cycles of CAR-T-EGFR<br>*Median CAR-T cell dose 2.65x10 <sup>9</sup> /kg in Guo<br>*Median CAR-T cell dose 0.97x10 <sup>7</sup> /kg in Feng<br>*Dose escalation over several days                                                                                                                                                         | phase 1/2     | *est. enrollment: 60<br>*nabpaclitaxel (100-250 mg/m2) and cyclophosphamide (15-35 mg/kg)<br><br>*Feng et al. 2016, only NSCLC: 2/11PR, 5/11SD, 4/11PD<br>*Guo et al. 2018, only advanced biliary tract cancers (14 cholangiocarcinomas and 5 gallbladder carcinomas):<br>*1/17 CR, 10/17 SD<br>*The median progression-free survival was 4 months. |                                                                                                                                    | NCT01869166; status unknown; PI: Weidong Han                                                                                                               | [37-39]      | Chinese PLA General Hospital, China                                       | *Feng et al., 2016: Mild skin toxicity, nausea, vomiting, dyspnea, andhypotension; one patient suffered from a transient grade 3/4 increase in serum lipase.<br>*On-target/off-tumor toxicity: serum lipase increase<br>*Feng et al., 2017: EGFR: mild chills, fever, fatigue, vomiting and muscle soreness, and a 9-day duration of delayed lower fever, accompanied by escalation of IL-6 and CRP, acute increase of glutamic-pyruvic transaminase and glutamic-oxalacetic transaminase, and grade 2 lichenstriatus-like skin pathological changes.<br>*Guo et al., 2018:<br>*infusion was tolerated;grade≥3 lymphopenia (10 of 19); grade≥3 thrombocytopenia (2 of 19); 3 patients grade>=3 acute fever/chill<br>*grade 1/2 target-mediated toxicities (mucosal/cutaneous toxicities and acute pulmonary edema (increase of IL-6 and CRP)) |
| EGFR                                    | NSCLC                                                                                                                                                                                                                                                                                                      | *CXCR5-modified<br>*Autologous T cells                                                      | ?                 | iv                | The first dose group: 0.5 × 10 <sup>9</sup> /kg CAR positive T cells; the second dose group: 1.58 × 10 <sup>9</sup> /kg CAR positive T cells; the third dose group: 5 × 10 <sup>9</sup> /kg CAR positive T cells. For subjects with body weight greater than 60 kg, the number of cells can only be calculated according to 60 kg of body weight. | phase 1       | est. enrollment: 11                                                                                                                                                                                                                                                                                                                                 |                                                                                                                                    | NCT04153799; recruiting; PI: Li Zhang                                                                                                                      | [40]         | *Sun Yat-sen UniversityGuangzhou<br>*Bio-gene Technology Co., Ltd., China |                                                                                                                                                                                                                                                                                                                                                                                                                                                                                                                                                                                                                                                                                                                                                                                                                                               |
| EGFR                                    | EGFR-family-member-positive, advanced solid tumor:<br>*lung,<br>*liver,<br>*stomach                                                                                                                                                                                                                        | *HerinCAR-PD1<br>*PD-1 antibody expressing CAR-T                                            | ?                 | iv                | 3 cycles<br>1-5x10 <sup>7</sup> /kg                                                                                                                                                                                                                                                                                                               | phase 1/2     | *est. enrollment: 20                                                                                                                                                                                                                                                                                                                                |                                                                                                                                    | NCT02862028; unknown; PI: Naiyan Han                                                                                                                       |              | shanghai international medical center, China                              |                                                                                                                                                                                                                                                                                                                                                                                                                                                                                                                                                                                                                                                                                                                                                                                                                                               |
| EGFR                                    | Metastatic colorectal cancer                                                                                                                                                                                                                                                                               | *4th generation (TRUCK)<br>*scFv-4-1BB/CD28/CD3ζ<br>*IL-12 expression under control of NFAT | ?                 | ?                 | MTD determination                                                                                                                                                                                                                                                                                                                                 | phase 1/2     | est. enrollment: 20                                                                                                                                                                                                                                                                                                                                 |                                                                                                                                    | NCT03542799; not yet recruiting; PI: Geng Tian                                                                                                             |              | Shenzhen second people's hospital, China                                  |                                                                                                                                                                                                                                                                                                                                                                                                                                                                                                                                                                                                                                                                                                                                                                                                                                               |
| EGFR                                    | Malignant gliomas                                                                                                                                                                                                                                                                                          | ?                                                                                           | lentiviral        | iv                | ?                                                                                                                                                                                                                                                                                                                                                 | phase 1       | *est. enrollment: 10<br>*Aldesleukin<br>*non-myeoablative conditioning (cy+flu)                                                                                                                                                                                                                                                                     |                                                                                                                                    | NCT02331693; unknown; PI: not provided                                                                                                                     |              | Renji Hospital, China                                                     |                                                                                                                                                                                                                                                                                                                                                                                                                                                                                                                                                                                                                                                                                                                                                                                                                                               |
| EGFR                                    | Metastatic colorectal cancer                                                                                                                                                                                                                                                                               | scFv-4-1BB/CD28/CD3ζ                                                                        | ?                 | ?                 | MTD determination                                                                                                                                                                                                                                                                                                                                 | phase 1/2     | est. enrollment: 20                                                                                                                                                                                                                                                                                                                                 |                                                                                                                                    | NCT03152435; unknown; PI: Geng Tian                                                                                                                        |              | Shenzhen second people's hospital, China                                  |                                                                                                                                                                                                                                                                                                                                                                                                                                                                                                                                                                                                                                                                                                                                                                                                                                               |
| EGFRvIII                                | Malignant glioma                                                                                                                                                                                                                                                                                           | scFv-CD28/4-1BB/CD3ζ                                                                        | retroviral        | iv                | Phase 1: dose escalation until MTD (maximum tolerated dose) determined, then phase 2                                                                                                                                                                                                                                                              | phase 1/2     | *est. enrollment: 107<br>*actual enrollement: 18<br>*non-myoablative, but lymphodepleting conditioning regimen(cy+flu)<br>*with aldesleukin (IL-2; also iv, 72,000IU/kg)                                                                                                                                                                            | *Combined steroids/ no steroids, Cohort 8: participant experienced a treatment-related mortality (TRM).<br>*many events            | NCT01454596; completed; PI: SA Rosenberg                                                                                                                   | [45,229,230] | NCI, NIH, USA                                                             | On-target/off-tumor toxicity: ARDS (one treatment-related death)                                                                                                                                                                                                                                                                                                                                                                                                                                                                                                                                                                                                                                                                                                                                                                              |
| EGFRvIII                                | Glioblastoma                                                                                                                                                                                                                                                                                               | *scFv-CD8hinge/tm-4-1BB/CD3ζ<br>*scFv based on 3C10, humanized                              | lentiviral        | iv                | 1-5x10 <sup>8</sup>                                                                                                                                                                                                                                                                                                                               | phase 1       | *est. enrollment: 12<br>*Temozolomide, radiation                                                                                                                                                                                                                                                                                                    | *Manufacturing and infusion are feasible and safe<br>*no off-tumor toxicity, no CRS<br>*O'Rourke et al.: 2/10PD, 1/10SD, 7/10 died | NCT02209376; Terminated (Sponsor decision to terminate prior to completion to pursue combination therapies. NCT03726515); PI: Donald O'Rourke, Susan Chang | [231-234]    | *Upenn<br>*University of California, San Francisco, USA                   | *Seizure, headache, weakness,cerebral edema<br>*On-target/off-tumor toxicity: no                                                                                                                                                                                                                                                                                                                                                                                                                                                                                                                                                                                                                                                                                                                                                              |
| EGFRvIII                                | Recurrent glioblastoma multiforme                                                                                                                                                                                                                                                                          | ?                                                                                           | lentiviral        | iv                | *3+3 dose escalation<br>*5x10 <sup>4</sup> /kg-1x10 <sup>7</sup> /kg                                                                                                                                                                                                                                                                              | phase 1       | *est. enrollment: 20<br>*cy+flu                                                                                                                                                                                                                                                                                                                     |                                                                                                                                    | NCT02844062; unknown; PI: Zhixiong Lin                                                                                                                     |              | Sanbo Brain Hospital capital medical university, China                    |                                                                                                                                                                                                                                                                                                                                                                                                                                                                                                                                                                                                                                                                                                                                                                                                                                               |
| EGFR family member                      | Advanced solid tumors                                                                                                                                                                                                                                                                                      | *herinCAR-PD1 cells<br>*PD-1 antibody expressing                                            | ?                 | iv                | 1-5x10 <sup>7</sup> /kg herin CAR-PD1 + physiological saline + 0.25% human alloalbumin (300ml)                                                                                                                                                                                                                                                    | phase 1/2     | *est. enrollment: 20                                                                                                                                                                                                                                                                                                                                |                                                                                                                                    | NCT02873390; unknown; PI: Jiangtao Wang                                                                                                                    |              | Ningo No.5 Hospital, China                                                |                                                                                                                                                                                                                                                                                                                                                                                                                                                                                                                                                                                                                                                                                                                                                                                                                                               |
| EGFRvIII                                | Newly-diagnosed WHO grade IV malignant glioma                                                                                                                                                                                                                                                              | ?                                                                                           | retroviral        | iv                | single infusion, MTD<br>4.5x10 <sup>6</sup> /kg<br>1.5x10 <sup>7</sup> /kg<br>4.5x10 <sup>7</sup> /kg<br>1.5x10 <sup>8</sup> /kg                                                                                                                                                                                                                  | phase 1       | *actual enrollment: 3<br>*lymphodepletion with temozolomide                                                                                                                                                                                                                                                                                         |                                                                                                                                    | NCT02664363; Terminated (Study funding ended); PI: David Ashley, Daniel Landi                                                                              | [203]        | Duke University Hospital, USA                                             |                                                                                                                                                                                                                                                                                                                                                                                                                                                                                                                                                                                                                                                                                                                                                                                                                                               |
| EGFR                                    | EGFR-positive advanced solid tumors                                                                                                                                                                                                                                                                        | CTLA-4 and PD-1 antibodies expressing                                                       | ?                 | iv                | 2-5x10 <sup>7</sup> cells/kg                                                                                                                                                                                                                                                                                                                      | phase 1/2     | *est. enrollment: 40<br>*cyclophosphamide                                                                                                                                                                                                                                                                                                           |                                                                                                                                    | NCT03182816; unknown; PI: Jiangtao Wang                                                                                                                    |              | Ningbo No.5 Hospital, China                                               |                                                                                                                                                                                                                                                                                                                                                                                                                                                                                                                                                                                                                                                                                                                                                                                                                                               |

| Antigen                                     | Cancer                                                                                                                                                                                                                                                                                                                                                                                                                      | CAR type /add-ons                                                                                                                                                                                                        | CAR transfer | Mode of injection                             | Number of cells                                                                                                                                                                                                                                                                                                                         | Phase     | Patient # /pretreatment /other drugs                                          | Outcome                                                    | NCT# /Status /PI                                                                                                                         | Ref           | Origin                                                      | Adverse events                                                                                                                                                                                                                                                                                                                                                                                 |
|---------------------------------------------|-----------------------------------------------------------------------------------------------------------------------------------------------------------------------------------------------------------------------------------------------------------------------------------------------------------------------------------------------------------------------------------------------------------------------------|--------------------------------------------------------------------------------------------------------------------------------------------------------------------------------------------------------------------------|--------------|-----------------------------------------------|-----------------------------------------------------------------------------------------------------------------------------------------------------------------------------------------------------------------------------------------------------------------------------------------------------------------------------------------|-----------|-------------------------------------------------------------------------------|------------------------------------------------------------|------------------------------------------------------------------------------------------------------------------------------------------|---------------|-------------------------------------------------------------|------------------------------------------------------------------------------------------------------------------------------------------------------------------------------------------------------------------------------------------------------------------------------------------------------------------------------------------------------------------------------------------------|
| EGFR                                        | Recurrent/refractory solid tumors in children and young adults:<br>*germ cell tumor,<br>*retinoblastoma,<br>*hepatoblastoma,<br>*wilms tumor,<br>*rhabdoid tumor,<br>*carcinoma,<br>*osteosarcoma,<br>*ewing sarcoma,<br>*rhabdomyosarcoma,<br>*synovial sarcoma,<br>*clear cell sarcoma,<br>*malignant peripheral nerve sheath tumors,<br>*desmoplastic small round cell tumor,<br>*soft tissue sarcoma,<br>*neuroblastoma | *scFv-4-1BB/CD3ζ<br>*In second arm also CD19 CAR-T (there with HER2tG selection marker)<br>*Selection suicide marker EGFRt                                                                                               | lentiviral   | ?                                             | ?                                                                                                                                                                                                                                                                                                                                       | phase 1   | est. enrollment: 36                                                           |                                                            | NCT03618381; recruiting;<br>PI: Katie Albert                                                                                             | [41]          | Seattle Children's Hospital, USA                            |                                                                                                                                                                                                                                                                                                                                                                                                |
| EGFRvIII                                    | Glioblastoma multiforme                                                                                                                                                                                                                                                                                                                                                                                                     | *4SCAR-IgT cells<br>*Secreting PD1 and PD-L1 antibodies                                                                                                                                                                  | ?            | iv or it                                      | *3+3 dose escalation<br>*1x10 <sup>6</sup> /kg-1x10 <sup>7</sup> /kg                                                                                                                                                                                                                                                                    | phase 1   | *est. enrollment: 20<br>*cy+flu                                               |                                                            | NCT03170141; enrolling by invitation;<br>PI: Lung-Ji Chang                                                                               |               | Shenzhen Geno-Immune Medical Institute, China               |                                                                                                                                                                                                                                                                                                                                                                                                |
| EGFRvIII                                    | GBM                                                                                                                                                                                                                                                                                                                                                                                                                         | *scFv-4-1BB/CD3ζ<br>*scFv based on 3C10, humanized                                                                                                                                                                       | ?            | ?                                             | ?                                                                                                                                                                                                                                                                                                                                       | phase 1   | *est. enrollment: 7<br>*Pembro                                                |                                                            | NCT03726515; Active, not recruiting;<br>PI: Donald O'Rourke                                                                              |               | Abramson Cancer Center of the Upenn, USA                    |                                                                                                                                                                                                                                                                                                                                                                                                |
| EGFRvIII                                    | Recurrent GBM                                                                                                                                                                                                                                                                                                                                                                                                               | ?                                                                                                                                                                                                                        | retroviral   | intracerebral (it)                            | *2.5x10 <sup>8</sup> starting dose,<br>*dose escalation                                                                                                                                                                                                                                                                                 | phase 1   | est. enrollment: 24                                                           |                                                            | NCT03283631; Suspended (We are temporally halting enrollment until a protocol amendment is approved.);<br>PI: Daniel Landi, David Ashley |               | Duke University Hospital, USA                               |                                                                                                                                                                                                                                                                                                                                                                                                |
| EGFR806                                     | EGFR-positive recurrent or refractory pediatric CNS tumors                                                                                                                                                                                                                                                                                                                                                                  | * also expressing EGFRt                                                                                                                                                                                                  | lentiviral   | Tumor resection cavity or ventricular system  | *dose escalation                                                                                                                                                                                                                                                                                                                        | phase 1   | *est. enrollment: 36                                                          |                                                            | NCT03638167; recruiting;<br>PI: Gust                                                                                                     |               | Seatle Children's Hospital, USA                             |                                                                                                                                                                                                                                                                                                                                                                                                |
| EpCAM                                       | EpCAM-positive cancer:<br>*colon,<br>*esophageal,<br>*pancreatic,<br>*prostate,<br>*gastric,<br>*hepatic                                                                                                                                                                                                                                                                                                                    | scFv-CD28/CD3ζ                                                                                                                                                                                                           | lentiviral   | Vascular interventional mediated or endoscopy | 1-10x10 <sup>6</sup> EpCAM-CAR positive T cells/kg                                                                                                                                                                                                                                                                                      | phase 1/2 | *est. enrollment: 60<br>*preconditioning                                      |                                                            | NCT03013712; recruiting;<br>PI: Xiao-an Li                                                                                               |               | First affiliated hospital of Chengdu Medical College, China |                                                                                                                                                                                                                                                                                                                                                                                                |
| EpCAM                                       | Liver cancer                                                                                                                                                                                                                                                                                                                                                                                                                | ?                                                                                                                                                                                                                        | ?            | ?                                             | 5 doses                                                                                                                                                                                                                                                                                                                                 | phase 2   | *est. enrollment: 25                                                          |                                                            | NCT02729493; unknown;<br>PI: Xianping Cheng                                                                                              |               | Sinobioway cell therapy Co. Ltd., China                     |                                                                                                                                                                                                                                                                                                                                                                                                |
| EpCAM                                       | Stomach cancer                                                                                                                                                                                                                                                                                                                                                                                                              | ?                                                                                                                                                                                                                        | ?            | ?                                             | 5 doses                                                                                                                                                                                                                                                                                                                                 | phase 2   | *est. enrollment: 19                                                          |                                                            | NCT02725125; Unknown;<br>PI: Yifu He                                                                                                     |               | Sinobioway cell therapy Co. Ltd., China                     |                                                                                                                                                                                                                                                                                                                                                                                                |
| EpCAM                                       | Advanced gastric cancer with peritoneal metastasis                                                                                                                                                                                                                                                                                                                                                                          | ?                                                                                                                                                                                                                        | ?            | ip                                            | ?                                                                                                                                                                                                                                                                                                                                       | phase 1   | *est. enrollment: 40                                                          |                                                            | NCT03563326; recruiting;<br>PI: Jian-Kun Hu                                                                                              |               | West China Hospital, Sichuan University, China              |                                                                                                                                                                                                                                                                                                                                                                                                |
| EpCAM                                       | *Nasopharyngeal carcinoma<br>*breast cancer                                                                                                                                                                                                                                                                                                                                                                                 | 3rd generation                                                                                                                                                                                                           | lentiviral   | ?                                             | dose escalation until MTD                                                                                                                                                                                                                                                                                                               | phase 1   | *est. enrollment: 30<br>*cyclophosphamide                                     |                                                            | NCT02915445; recruiting;<br>PI: Wie Wang                                                                                                 |               | West China Hospital, Sichuan University, China              |                                                                                                                                                                                                                                                                                                                                                                                                |
| EphA2                                       | Malignant glioma                                                                                                                                                                                                                                                                                                                                                                                                            | ?                                                                                                                                                                                                                        | ?            | ?                                             | ?                                                                                                                                                                                                                                                                                                                                       | phase 1/2 | *actual enrollment: 60<br>*no preconditioning                                 |                                                            | NCT02575261; completed;<br>PI: Lizhi Niu                                                                                                 |               | Fuda Cancer Hospital, Guangzhou, China                      |                                                                                                                                                                                                                                                                                                                                                                                                |
| ErbB dimers (HER2, 3 and EGFR)              | SCCHN (squamous cell cancer of the head and neck)                                                                                                                                                                                                                                                                                                                                                                           | *T1E-CD28/CD3ζ; CAR coupling a promiscuous ErbB ligand derived from EGF and TGFα to a fused CD28+CD3ζ endodomain<br>*4αβ, a chimeric cytokine receptor containing the IL-4Rα ectodomain coupled to the IL-2Rβ endodomain | retroviral   | it                                            | *dose escalation<br>*10 <sup>7</sup> -10 <sup>9</sup> transduced T4+ T cells                                                                                                                                                                                                                                                            | phase 1   | *est. enrollment: 30<br>*lower dose without lymphodepletion, higher dose with | CAR-T Congress EU 2019: 9/15 SD, 1/15 CR                   | NCT01818323; recruiting,;<br>PI: John Maher                                                                                              | [142-144,190] | King's College London, UK                                   |                                                                                                                                                                                                                                                                                                                                                                                                |
| FAP                                         | Malignant pleural mesothelioma                                                                                                                                                                                                                                                                                                                                                                                              | *scFv-CD28/CD3ζ<br>*scFv based on humanized form of F19 (sibrotuzumab)                                                                                                                                                   | retroviral   | ip                                            | 1x10 <sup>6</sup> single dose                                                                                                                                                                                                                                                                                                           | phase 1   | *actual enrollment: 4<br>*lymphodepletion                                     |                                                            | NCT01722149,; completed,,<br>PI: Alessandra Curioni                                                                                      | [131,132]     | University Hospital Zurich, Switzerland                     |                                                                                                                                                                                                                                                                                                                                                                                                |
| FBP (FRα; autologous folate receptor-alpha) | Recurrent high grade serous ovarian cancer                                                                                                                                                                                                                                                                                                                                                                                  | MOv19-4-1BB/CD3ζ                                                                                                                                                                                                         | lentiviral   | ip                                            | *Cohort 1: single infusion 1-3x10 <sup>7</sup> /m <sup>2</sup> without lypmodep.<br>*Cohort 2: single infusion 1-3x10 <sup>7</sup> /m <sup>2</sup> with lypmodep.<br>*Cohort 3: single infusion 1-3x10 <sup>6</sup> /m <sup>2</sup> with lypmodep.<br>*Cohort -1: single infusion 1-3x10 <sup>6</sup> /m <sup>2</sup> without lypmodep. | phase 1   | *est. enrollment: 18<br>*w/ or w/o cy+flu                                     |                                                            | NCT03585764; recruiting;<br>PI: Payal D Shah                                                                                             |               | University of Pennsylvania, Philadelphia, USA               |                                                                                                                                                                                                                                                                                                                                                                                                |
| FBP (folate binding protein) (FRα)          | Ovarian epithelial cancer                                                                                                                                                                                                                                                                                                                                                                                                   | *MOv-gamma-PBL<br>*scFv-FcεRIγ<br>*scFv based on MOv18                                                                                                                                                                   | retroviral   | iv                                            | *Dose escalation until MTD<br>*0.3-5x10 <sup>10</sup>                                                                                                                                                                                                                                                                                   | phase 1   | *with/without IL-2 added<br>*no preconditioning                               | No reduction in tumor burdenwas seen in any patient (n=14) | NCT00019136; completed,,<br>PI: Steven Rosenberg                                                                                         | [235]         | NCI, USA                                                    | *One patient reported no severe CAR-T cell related toxicities. 12 patients experienced grade 1 or 2 toxicity events and 5 patients experienced grade3–4 toxicity events.<br>*Grade 3/4 toxicities including hypotension and dyspneas well as less frequently fatigue, leukopenia, rigors, sinustachycardia, and diarrhea, in some patients receiving IL-2<br>*On-target/off-tumor toxicity: no |

| Antigen | Cancer                                                                            | CAR type /add-ons                                                                                                                                        | CAR transfer | Mode of injection | Number of cells                                                                                                                                                                                                                                                                                                                                                                                                                                                        | Phase     | Patient # /pretreatment /other drugs                                | Outcome                                                                                                      | NCT# /Status /PI                                                                 | Ref       | Origin                                                                         | Adverse events                                                                                                           |
|---------|-----------------------------------------------------------------------------------|----------------------------------------------------------------------------------------------------------------------------------------------------------|--------------|-------------------|------------------------------------------------------------------------------------------------------------------------------------------------------------------------------------------------------------------------------------------------------------------------------------------------------------------------------------------------------------------------------------------------------------------------------------------------------------------------|-----------|---------------------------------------------------------------------|--------------------------------------------------------------------------------------------------------------|----------------------------------------------------------------------------------|-----------|--------------------------------------------------------------------------------|--------------------------------------------------------------------------------------------------------------------------|
| GD2     | Brain tumors (high grade glioma (HGG) or diffuse intrinsic pontine glioma (DIPG)) | *Constitutively active IL-7R                                                                                                                             | retroviral   | iv                | *DL0: 1x10 <sup>7</sup> GD2 CAR-T (without C7R)<br>*DL1: 1x10 <sup>7</sup> C7R-GD2 CAR-T<br>*DL2: 3x10 <sup>7</sup> C7R-GD2 CAR-T<br>*DL3: 1x10 <sup>8</sup> C7R-GD2 CAR-T                                                                                                                                                                                                                                                                                             | phase 1   | *est. enrollment: 34<br>*cy+flu                                     |                                                                                                              | NCT04099797; recruiting; PI: Bilal Omer, MD                                      | [188]     | Baylor College of Medicine, USA                                                |                                                                                                                          |
| GD2     | *Relapsed/refractory neuroblastoma<br>*Uveal melanoma                             | *C7R-GD2.CAR-T<br>*constitutively active IL-7R                                                                                                           | retroviral   | iv                | *Dose level 0: 1x10 <sup>7</sup> CAR-T w/o lymphodep.<br>*Dose level 1: 1x10 <sup>7</sup> CAR-T w/ lymphodep.<br>*Dose level 2: 3x10 <sup>7</sup> CAR-T w/ lymphodep.<br>*Dose level 3: 1x10 <sup>8</sup> CAR-T w/ lymphodep.                                                                                                                                                                                                                                          | phase 1   | *est. enrollment: 34<br>*lymphodepletion: cy+flu                    |                                                                                                              | NCT03635632; recruiting; PI: Bilal Omer                                          | [188]     | Baylor College of Medicine, USA                                                |                                                                                                                          |
| GD2     | *Glioma of spinal cord<br>*Glioma of brainstem                                    | *scFv-4-1BB/CD3ζ<br>*iCasp9                                                                                                                              | retroviral   | infusion?         | *3+3 dose escalation, subjects with H3K27M-mutant DIPG or spinal DMG, starting with Dose Level 1<br>*Dose Level 1: 1x10 <sup>6</sup> CAR+ T cells/kg<br>*Dose Level 2: 3x10 <sup>6</sup> CAR+ T cells/kg<br>*Dose Level 3: 10x10 <sup>6</sup> CAR+ T cells/kg                                                                                                                                                                                                          | phase 1   | *est. enrollment: 54<br>*cy+flu                                     |                                                                                                              | NCT04196413; recruiting; PI: Michelle Monje                                      |           | Lucile Packard Children's Hospital (LPCH), Stanford, USA                       |                                                                                                                          |
| GD2     | *GD2+ solid tumors:<br>*sarcoma,<br>*neuroblastoma,<br>*melanoma<br>*osteosarcoma | *scFv-OX40/CD28/CD3ζ<br>*iCD9<br>*scFv based on 14g2a                                                                                                    | retroviral   | iv                | escalating doses<br>*dose 1: 1x10 <sup>5</sup> cells/kg<br>*dose 2: 1x10 <sup>6</sup> cells/kg<br>*dose 3: 3x10 <sup>6</sup> cells/kg<br>*dose 4: 1x10 <sup>7</sup> cells/kg                                                                                                                                                                                                                                                                                           | phase 1   | *original est. enrollment: 72<br>*actual enrollment: 15<br>*cy+flu  | In Gargett et al., : formelanoma 4/4 PR                                                                      | NCT02107963; completed; PI: Rosandra Kaplan                                      | [235-238] | NCI, NIH, USA                                                                  | On-target/off-tumor toxicity: no                                                                                         |
| GD2     | Relapsed or refractory neuroblastoma in children                                  | ?                                                                                                                                                        | ?            | ?                 | ?                                                                                                                                                                                                                                                                                                                                                                                                                                                                      | phase 1/2 | *est. enrollment: 22                                                |                                                                                                              | NCT02919046; recruiting; PI: Yongjun Fang, Kuiran Dong                           |           | Nanjing Children's Hospital, China                                             |                                                                                                                          |
| GD2     | Refractory or metastatic GD2-positive:<br>*sarcoma<br>*neuroblastoma              | *iC9-GD2-CAR-VZV-CTLs (in combination with VZV vaccination) (transgenic VZV-specific T cells)<br>*scFv-OX40/CD28/CD3ζ<br>*iCasp9<br>*scFv based on 14g2a | retroviral   | iv                | DL1: 1x10 <sup>6</sup> cells/m <sup>2</sup><br>DL2: 1x10 <sup>7</sup> cells/m <sup>2</sup><br>DL7: first VZV vaccine then 1x10 <sup>7</sup> cells/m <sup>2</sup><br>DL8: first VZV vaccine then 1x10 <sup>8</sup> cells/m <sup>2</sup><br>DL9: first lymphodepletion then 1x10 <sup>8</sup> cells/m <sup>2</sup><br>DL10: first lymphodepletion then 5x10 <sup>8</sup> cells/m <sup>2</sup><br>DL11: first lymphodepletion then 1x10 <sup>9</sup> cells/m <sup>2</sup> | phase 1   | *est. enrollment: 26<br>*lymphodepletion: cy+flu                    |                                                                                                              | NCT01953900; Active, not recruiting; PI: Lisa Wang, Sarah Whittle, Cliona Rooney | [41,159]  | Baylor College of Medicine, USA                                                |                                                                                                                          |
| GD2     | Recurrent neuroblastoma                                                           | 4th generation                                                                                                                                           | lentiviral   | ?                 | >=2x10 <sup>5</sup> cells/kg                                                                                                                                                                                                                                                                                                                                                                                                                                           | phase 2   | *est. enrollment: 30<br>*cy+flu                                     |                                                                                                              | NCT02765243; recruiting; PI: Lihua Yang                                          |           | Southern Medical University, China                                             |                                                                                                                          |
| GD2     | GD2+ solid tumors                                                                 | *4th generation<br>*inducible apoptotic caspase 9 domain                                                                                                 | lentiviral   | ?                 | ?                                                                                                                                                                                                                                                                                                                                                                                                                                                                      | phase 1/2 | *est. enrollment: 100<br>*cy+flu                                    |                                                                                                              | NCT02992210; recruiting; PI: Lung-Ji Chang                                       |           | Shenzhen Geno-Immune Medical Institute, China                                  |                                                                                                                          |
| GD2     | Relapsed/refractory melanoma                                                      | *scFv-CD3ζ<br>*vaccine-specific T cells<br>*scFv based on 14g2a                                                                                          | retroviral   | ?                 | ?                                                                                                                                                                                                                                                                                                                                                                                                                                                                      | phase 1   | est. enrollment: 3                                                  |                                                                                                              | NCT02482532; recruiting; PI: Gary Doolittle                                      |           | KU Cancer Center, Fairway, Kansas, USA                                         |                                                                                                                          |
| GD2     | Neuroblastoma                                                                     | *scFv-CD3ζ<br>*In EBV-specific T cells<br>*scFv based on 14g2a                                                                                           | retroviral   | iv                | 2x10 <sup>7</sup> cells/m <sup>2</sup><br>5x10 <sup>7</sup> cells/m <sup>2</sup><br>1x10 <sup>8</sup> cells/m <sup>2</sup><br>single infusion                                                                                                                                                                                                                                                                                                                          | phase 1   | *actual enrollment: 19<br>*without lymphodepletion!                 | 3/19 CR, 1/19 PR, 8/19 NED (no evidence of disease), 6/19PD, 1/19SD, 2/19 tumor necrosis, 1/19 relapse       | NCT00085930; active, not recruiting; PI: Andras A Heczey                         | [160,161] | *Texas Children's Hospital, Houston, Texas<br>*Baylor College of Medicine, USA | *Mild to moderate local pain at the site of tumor, necrosis in two patients<br>*On-target/off-tumor toxicity: no         |
| GD2     | Relapsed/refractory neuroblastoma                                                 | *3rd generation<br>*Expressing IL-15<br>*iCasp9 safety switch                                                                                            | ?            | ?                 | dose escalation<br>0,5x10 <sup>6</sup> , 1x10 <sup>6</sup> , 1.5x10 <sup>6</sup> cells/kg                                                                                                                                                                                                                                                                                                                                                                              | phase 1   | *est. enrollment: 18<br>*cy+flu                                     |                                                                                                              | NCT03721068; recruiting; PI: George Hucks                                        |           | UNC Lineberger Comprehensive Cancer Center, USA                                |                                                                                                                          |
| GD2     | Relapsed and refractory neuroblastoma                                             | scFv-CD28/CD3ζ                                                                                                                                           | ?            | iv                | DL1: 1x10 <sup>7</sup> CAR-T/m <sup>2</sup><br>DL2: cyclophosphomide and 1x10 <sup>7</sup> CAR-T/m <sup>2</sup><br>DL3: cy+flu and 1x10 <sup>7</sup> CAR-T/m <sup>2</sup><br>DL4: cy+flu and 1x10 <sup>8</sup> CAR-T/m <sup>2</sup><br>DL5: cy+flu and 5-10x10 <sup>6</sup> CAR-T/m <sup>2</sup>                                                                                                                                                                       | phase 1   | *est. enrollment: 27<br>*cy+flu                                     | No clinical responses in first 12 patients, but response in many sites of bone marrow disease for 1 patient. | NCT02761915; recruiting; PI: not provided                                        | [239]     | Cancer Research UK                                                             |                                                                                                                          |
| GD2     | Pediatric relapsed/refractory neuroblastoma                                       | *iCasp9                                                                                                                                                  | ?            | ?                 | 1-10x10 <sup>6</sup> /kg CAR+ T cells, single dose                                                                                                                                                                                                                                                                                                                                                                                                                     | phase 1/2 | *est. enrollment: 42<br>*lymphodepletion                            |                                                                                                              | NCT03373097; recruiting; PI: unknown                                             |           | Bambino Gesu Hospital and Research Institute, Italy                            |                                                                                                                          |
| GD2     | GD2+ glioma                                                                       | ?                                                                                                                                                        | ?            | infusion?         | ?                                                                                                                                                                                                                                                                                                                                                                                                                                                                      | phase 1/2 | *actual enrollment: 60                                              |                                                                                                              | NCT03252171; completed; PI: Lizhi Niu                                            |           | Fuda Cancer Hospital, China                                                    |                                                                                                                          |
| GD2     | Relapsed/refractory neuroblastoma                                                 | *scFv-CD3ζ<br>*In allogeneic, multivirus-specific CTL after allogeneic HSCT<br>*scFv based on 14g2a                                                      | retroviral   | ?                 | A single infusion of 2x10 <sup>9</sup> /m <sup>2</sup>                                                                                                                                                                                                                                                                                                                                                                                                                 | phase 1   | *actual enrollment: 5<br>*submyeloblastic conditioning regimen      | *no toxicity vs. patient<br>*3 evaluable: non-complete response: 3                                           | NCT01460901; completed; PI: Doug Myers                                           |           | Children's Mercy Hospital Kansas City, USA                                     |                                                                                                                          |
| GD2     | Neuroblastoma                                                                     | *3rd generation (CD28 and OX40)<br>*with iCaspase suicide safety switch                                                                                  | retroviral   | iv                | 1x10 <sup>7</sup> , 1x10 <sup>8</sup> , 2x10 <sup>8</sup> cells/m <sup>2</sup>                                                                                                                                                                                                                                                                                                                                                                                         | phase 1   | *actual enrollment: 11<br>* w/ and w/o cy+flu<br>*w/ and w/o Pembro | 3/11 SD, 8/11 PD                                                                                             | NCT01822652; active, not recruiting; PI: Andras A. Heczey                        | [199]     | Baylor College of Medicine, USA                                                | Grade 3 or higher: fever and neutropenia, anemia, leukopenia, lymphopenia, neutropenia, thrombocytopenia, extremity pain |



| Antigen                | Cancer                                                                                                                                                                        | CAR type /add-ons                                                                                                                                                                 | CAR transfer   | Mode of injection | Number of cells                                                                                                                                                                                                     | Phase         | Patient # /pretreatment /other drugs                                                | Outcome                        | NCT# /Status /PI                                                                                                     | Ref       | Origin                                                                                 | Adverse events                                                                                                                                                    |
|------------------------|-------------------------------------------------------------------------------------------------------------------------------------------------------------------------------|-----------------------------------------------------------------------------------------------------------------------------------------------------------------------------------|----------------|-------------------|---------------------------------------------------------------------------------------------------------------------------------------------------------------------------------------------------------------------|---------------|-------------------------------------------------------------------------------------|--------------------------------|----------------------------------------------------------------------------------------------------------------------|-----------|----------------------------------------------------------------------------------------|-------------------------------------------------------------------------------------------------------------------------------------------------------------------|
| GD2                    | Glioma                                                                                                                                                                        | ?                                                                                                                                                                                 | ?              | iv                |                                                                                                                                                                                                                     | phase 1/2     | actual enrollment: 2                                                                |                                | NCT04406610; terminated; PI: ?                                                                                       |           | Fuda Cancer Hospital, Guangzhou, China                                                 |                                                                                                                                                                   |
| gp100(209-217) /HLA-A2 | Malignant melanoma                                                                                                                                                            | *TCR-like antibody-CAR-4-1BB/CD3ζ<br>*GPA-TriMAR (binding gp100/HLA-A2)<br>*extracellular 3 subunits, one binds antigen, other two function to stimulate the innate immune system | lentiviral     | ?                 | ?                                                                                                                                                                                                                   | early phase 1 | *est. enrollment: 6                                                                 |                                | NCT03649529;; recruiting; PI: Haifeng Lin                                                                            | [155,156] | Second affiliated hospital of Hainan Medical University, China                         |                                                                                                                                                                   |
| GPC3 (glypican-3)      | HCC                                                                                                                                                                           | ?                                                                                                                                                                                 | ?              | ?                 | every two weeks<br>DL1: 1x10 <sup>7</sup> /m <sup>2</sup><br>DL2: 3x10 <sup>7</sup> /m <sup>2</sup><br>DL3: 1x10 <sup>8</sup> /m <sup>2</sup>                                                                       | phase 1       | *est. enrollment: 20                                                                |                                | NCT04121273; recruiting; PI: not provided                                                                            |           | The Affiliated Nanjing Drum Tower Hospital of Nanjing University Medical School, China |                                                                                                                                                                   |
| GPC3 (glypican-3)      | Liver cancer                                                                                                                                                                  | *2nd generation<br>*Co-expressing cytokines IL-21 and IL-15<br>*scFv based on GC33                                                                                                | retroviral     | iv                | MTDDL1: 1x10 <sup>7</sup> /m <sup>2</sup> DL2: 3x10 <sup>7</sup> /m <sup>2</sup> DL3: 1x10 <sup>8</sup> /m <sup>2</sup> DL4: 3x10 <sup>9</sup> /m <sup>2</sup> DL5: 1x10 <sup>9</sup> /m <sup>2</sup>               | phase 1       | *est. enrollment: 60<br>*cy+flu                                                     |                                | NCT04093648; Withdrawn (The key elements of this study were incorporated into another study.); PI: Andras Heczey, MD |           | Baylor College of Medicine, USA                                                        |                                                                                                                                                                   |
| GPC3 (glypican-3)      | Advanced HCC                                                                                                                                                                  | 4th generation                                                                                                                                                                    | ?              | iv                | *MTD<br>*3 dose levels<br>*3+3 dose escalation<br>*at dose level 3: Cohort 1: combined with tyrosine kinase inhib. Cohort 2: combined with PD-1/PD-L1 antibodies                                                    | phase 1       | *est. enrollment: 36<br>*cy+flu                                                     |                                | NCT03980288; recruiting; PI: Tingbo Liang                                                                            |           | The First Affiliated Hospital, Zhejiang University, China                              |                                                                                                                                                                   |
| GPC3 (glypican-3)      | Advanced HCC                                                                                                                                                                  | ?                                                                                                                                                                                 | ?              | iv                | MTD; the subjects are enrolled into 2 dose levels cohorts in sequence                                                                                                                                               | phase 1       | *est. enrollment: 15<br>*lymphodepleting pretreatment                               |                                | NCT03884751; recruiting; PI: Qin shukui; Zhai bo                                                                     |           | The 81st Hospital of PLA Renji Hospital, China                                         |                                                                                                                                                                   |
| GPC3 (glypican-3)      | Recurrent or refractory lung squamous cell carcinoma                                                                                                                          | scFv-CD28/CD3ζ                                                                                                                                                                    | lentiviral     | iv                | dose escalation: 1x10 <sup>5</sup> -2x10 <sup>9</sup> CAR-GPC3 T cells/kg                                                                                                                                           | phase 1       | *est. enrollment: 20<br>*cy+flu                                                     |                                | NCT02876978; unknown; PI: Jiang Liyan                                                                                |           | Shanghai Chest Hospital, Shanghai Jiaotong University, China                           |                                                                                                                                                                   |
| GPC3 (glypican-3)      | Refractory HCC                                                                                                                                                                | scFv-CD28/CD3ζ                                                                                                                                                                    | lentiviral     | iv                | 20x10 <sup>8</sup> single dose                                                                                                                                                                                      | phase 1       | *est. enrollment: 20<br>*cy+flu                                                     | 3/5 PD, 1/5 NE, 1/5 PR         | NCT03146234; completed; PI: Bo Zhai                                                                                  | [25,240]  | Renji Hospital, China                                                                  | Decrease WBC, platelet count, lymphocyte count, neutrophil count, Pyrexia, increased APTT, AST, and ALT, bilirubin level increased, renal impairment, hypotension |
| GPC3 (glypican-3)      | GPC3+ cancer: *HCC, *squamous cell lung cancer                                                                                                                                | *3rd generation<br>*GPC3-T2-CAR (GPC3 and/or GPC3 and soluble TGFbeta targeting)<br>*IL-7/CCL19 producing                                                                         | ?              | iv, it            | ?                                                                                                                                                                                                                   | phase 1       | est. enrollment: 30                                                                 |                                | NCT03198546; recruiting; PI: Zhengfeng Zhang                                                                         | [183]     | Second affiliated hospital of Guangzhou medical university, China                      |                                                                                                                                                                   |
| GPC3 (glypican-3)      | Advanced HCC                                                                                                                                                                  | scFv-4-1BB/CD3ζ                                                                                                                                                                   | transduction ? | it                | 1-10x10 <sup>6</sup> CAR+ T cells                                                                                                                                                                                   | phase 1/2     | *est. enrollment: 10                                                                |                                | NCT03130712; unknown; PI: Lu Yinying                                                                                 |           | Beijing 302 Hospital, China                                                            |                                                                                                                                                                   |
| GPC3 (glypican-3)      | GPC3+ advanced HCC                                                                                                                                                            | *scFv-4-1BB/CD3ζ<br>*tEGFR                                                                                                                                                        | retroviral     | iv, TAI           | ?                                                                                                                                                                                                                   | phase 1/2     | *est. enrollment: 20<br>*transcatheter arterial chemoembolization (TACE)<br>*cy+flu |                                | NCT03084380; not yet recruiting; PI: Qingzhu Jia                                                                     |           | Xinqiao Hospital of Chongqing, China                                                   |                                                                                                                                                                   |
| GPC3 (glypican-3)      | HCC                                                                                                                                                                           | scFv-CD28/4-1BB/CD3ζ                                                                                                                                                              | retroviral     | ?                 | dose escalation: DL1: 1x10 <sup>7</sup> /m <sup>2</sup> DL2: 3x10 <sup>7</sup> /m <sup>2</sup> DL3: 1x10 <sup>8</sup> /m <sup>2</sup> DL4: 3x10 <sup>8</sup> /m <sup>2</sup> DL5: 1x10 <sup>9</sup> /m <sup>2</sup> | phase 1       | *est. enrollment: 14<br>*cy+flu                                                     |                                | NCT02905188; recruiting; PI: Andras Heczey                                                                           | [134]     | Baylor College of Medicine, USA                                                        |                                                                                                                                                                   |
| GPC3 (glypican-3)      | HCC                                                                                                                                                                           | ?                                                                                                                                                                                 | ?              | ?                 | ?                                                                                                                                                                                                                   | phase 1/2     | actual enrollment: 60                                                               |                                | NCT02723942; completed; PI: Lizhi Niu                                                                                |           | Fuda Cancer Hospital; Guangzhou, China                                                 |                                                                                                                                                                   |
| GPC3 (glypican-3)      | Pediatric solid tumors (GAP)                                                                                                                                                  | scFv based on GC33                                                                                                                                                                | retroviral     | ?                 | dose escalation: DL1: 1x10 <sup>7</sup> /m2 DL2: 3x10 <sup>7</sup> /m2 DL3: 1x10 <sup>8</sup> /m2 DL4: 3x10 <sup>8</sup> /m2 DL5: 1x10 <sup>9</sup> /m2                                                             | phase 1       | *est. enrollment: 18<br>*cy+flu                                                     |                                | NCT02932956; recruiting; PI: Heczey                                                                                  |           | Baylor College of Medicine, USA                                                        |                                                                                                                                                                   |
| GPC3 (glypican-3)      | Advanced HCC                                                                                                                                                                  | scFv-4-1BB/CD3ζ                                                                                                                                                                   | ?              | TAI               | 1-10x10 <sup>8</sup> CAR+ T cells/kg                                                                                                                                                                                | Phase 1/2     | *est. enrollment: 30<br>*single dose of cyclophosphamide (1.5grams/m <sup>2</sup> ) |                                | NCT02715362; unknown; PI: Xu Aimin                                                                                   |           | Renji Hospital, China                                                                  |                                                                                                                                                                   |
| GPC3 (glypican-3)      | *Pediatric solid tumors<br>*Liver cancer<br>*Rhabdomyosarcoma<br>*Malignant rhabdoid tumor<br>*Liposarcoma (soft tissue)<br>*Wilms tumor<br>*Yolk sac tumor (germ cell tumor) | *AGAR T cells<br>*IL-15 armored<br>*iCasp9                                                                                                                                        | retroviral     | iv                | DL1: 3x10 <sup>7</sup> /m <sup>2</sup> DL2: 1x10 <sup>8</sup> /m <sup>2</sup> DL3: 3x10 <sup>8</sup> /m <sup>2</sup> DL4: 1x10 <sup>9</sup> /m <sup>2</sup>                                                         | phase 1       | *est. enrollment: 24<br>*cy+flu                                                     |                                | NCT04377932; not yet recruiting; PI: Andras Heczey and David Steffin                                                 |           | Baylor College of Medicine, USA                                                        |                                                                                                                                                                   |
| GPC3 (glypican-3)      | Advanced HCC                                                                                                                                                                  | scFv-CD28/CD3ζ                                                                                                                                                                    | lentiviral     | iv                | 7x10 <sup>8</sup> -92.5x10 <sup>8</sup> , split dose                                                                                                                                                                | phase 1       | *actual enrollment: 13<br>*either cy only, or cy+flu                                | 2/8 SD, 1/8 PR, 3/8 NE, 2/8 PD | NCT02395250; completed; PI: Bo Zhai                                                                                  | [25,240]  | Renji Hospital, China                                                                  | Decrease WBC, platelet count, lymphocyte count,pyrexia, increased APTT, AST, and ALT, bilirubin level increased                                                   |
| GPC3 (glypican-3)      | Previously treated solid tumors                                                                                                                                               | TAK-102                                                                                                                                                                           | ?              | iv                | Cohort 1: 1 × 10 <sup>7</sup> CAR (+) cells/body [starting dose]. Cohort 2: 1 × 10 <sup>8</sup> CAR (+) cells/body. Cohort 3: 1 × 10 <sup>9</sup> CAR (+) cells/body.                                               | phase 1       | *est. enrollment: 18                                                                |                                | NCT04405778; not yet recruiting; PI: ?                                                                               |           | Takeda, Japan                                                                          |                                                                                                                                                                   |

| Antigen | Cancer                                                                                                                                                                                                                    | CAR type /add-ons                                                                                        | CAR transfer  | Mode of injection                            | Number of cells                                                                                                                                                                                                                                                                                                                                                                                                                                                                                                        | Phase      | Patient # /pretreatment /other drugs                                                        | Outcome                                                                                         | NCT# /Status /PI                                                                                                                                              | Ref     | Origin                                                         | Adverse events                                                                                                                                                                                                                                                                                                                                                                                                             |
|---------|---------------------------------------------------------------------------------------------------------------------------------------------------------------------------------------------------------------------------|----------------------------------------------------------------------------------------------------------|---------------|----------------------------------------------|------------------------------------------------------------------------------------------------------------------------------------------------------------------------------------------------------------------------------------------------------------------------------------------------------------------------------------------------------------------------------------------------------------------------------------------------------------------------------------------------------------------------|------------|---------------------------------------------------------------------------------------------|-------------------------------------------------------------------------------------------------|---------------------------------------------------------------------------------------------------------------------------------------------------------------|---------|----------------------------------------------------------------|----------------------------------------------------------------------------------------------------------------------------------------------------------------------------------------------------------------------------------------------------------------------------------------------------------------------------------------------------------------------------------------------------------------------------|
| HER2    | *Chemotherapy refractory HER-2+ advanced solid tumors:<br>*biliary tract cancers,<br>*pancreatic cancers                                                                                                                  | *scFv-CD3ζ<br>*scFv-4-1BB/CD3ζ                                                                           | lentiviral    | iv                                           | 1 to 2 cycles of CAR-T-HER2 (median CAR+ T cells 2.1x10 <sup>6</sup> /kg); dose escalation over several days                                                                                                                                                                                                                                                                                                                                                                                                           | phase 1/2  | *actual enrollment: 11<br>*nabpaclitaxel (100-200 mg/m2) and cyclophosphamide (15-35 mg/kg) | *1/11 PR, 5/11 SD, 5/11 PD                                                                      | NCT01935843;<br>status unknown;<br>PI: Weidong Han                                                                                                            | [44]    | Chinese PLA General Hospital, China                            | *Mild-to-moderate fatigue, nausea, vomiting, myalgia, arthralgia, and lymphopenia,<br>*Except 1 grade-3 acute febrile syndrome and 1 abnormal elevation of transaminase<br>*post-infusion toxicities: 1 case of reversible severe upper gastrointestinal hemorrhage (metastasis), and 2 cases of grade 1-2 delayed fever (release of C-reactive protein and IL-6)<br>*On-target/off-tumor toxicity: Liver enzymes increase |
| HER2    | *Bladder cancer<br>*Head and neck squamous cell carcinoma<br>*Cancer of the salivary gland<br>*Lung cancer<br>*Breast cancer<br>*Gastric cancer<br>*Esophageal cancer<br>*Colorectal cancer<br>*Pancreatic adenocarcinoma | *HER2 CAR-modified adenovirus-specific CTL<br>*with oncolytic adenovirus injected intratumorally         | ?             | ?                                            | *Dose Level 1<br>CAAdVEC = 1x10 <sup>10</sup><br>HER2.CAR-AdVST = 0<br>*Dose Level 2<br>CAAdVEC = 1x10 <sup>10</sup><br>HER2.CAR-AdVST = 1x10 <sup>6</sup><br>*Dose Level 3<br>CAAdVEC = 1x10 <sup>11</sup><br>HER2.CAR-AdVST = 1x10 <sup>6</sup><br>*Dose Level 4<br>CAAdVEC = 1x10 <sup>11</sup><br>HER2.CAR-AdVST = 1x10 <sup>7</sup><br>*Dose Level 5<br>CAAdVEC = 1x10 <sup>12</sup><br>HER2.CAR-AdVST = 1x10 <sup>7</sup><br>*Dose Level 6<br>CAAdVEC = 1x10 <sup>12</sup><br>HER2.CAR-AdVST = 1x10 <sup>8</sup> | phase 1    | est. enrollment: 39                                                                         |                                                                                                 | NCT03740256;<br>not yet recruiting;<br>PI: Andrew Sikora                                                                                                      |         | Texas Children's Hospital, USA                                 |                                                                                                                                                                                                                                                                                                                                                                                                                            |
| HER2    | Recurrent/refractory grade III-IV glioma                                                                                                                                                                                  | *scFv-4-1BB/CD3ζ<br>*CD19t<br>*in memory-enriched T cells                                                | lentiviral    | ic, it, or intraventricular , or both        | ?                                                                                                                                                                                                                                                                                                                                                                                                                                                                                                                      | phase 1    | est. enrollment: 51                                                                         |                                                                                                 | NCT03389230;<br>recruiting;<br>PI: Behnam Badie                                                                                                               |         | City of Hope Medical Center, USA                               |                                                                                                                                                                                                                                                                                                                                                                                                                            |
| HER2    | Colon cancer                                                                                                                                                                                                              | *scFv-CD28/4-1BB/CD3ζ<br>*scFv based on Herceptin (Trastuzumab; humanized)                               | retroviral    | iv                                           | 1x10 <sup>10</sup>                                                                                                                                                                                                                                                                                                                                                                                                                                                                                                     | phase I/II | *actual enrollment: 1<br>*lymphodepletion (cy+flu)<br>*Aldesleukin (IL-2)                   | 1 treated, 1 dead CRS due to low expression of ERBB2 (HER2) on lung                             | NCT00924287;;<br>Terminated (This study was terminated after the first patient treated on study died as a result of the treatment);<br>PI: Steven A Rosenberg | [12]    | NCI, NIH, USA                                                  | *Respiratory distress and dramatic pulmonary infiltrate on chest X-ray were observed soon after CAR-T cell administration.<br>*Severe hypotension, bradycardia, gastrointestinal bleeding, resulting in a cardiac arrest.<br>*The patient died 5 days after the CAR-T infusion.<br>*On-target/off-tumor toxicity: ARDS (fatal)                                                                                             |
| HER2    | HER2-positive recurrent/refractory pediatric CNS tumors                                                                                                                                                                   | *Third generation<br>*EGFRt                                                                              | lentiviral    | tumor resection cavity or ventricular system | ?                                                                                                                                                                                                                                                                                                                                                                                                                                                                                                                      | phase 1    | *est. enrollment: 36                                                                        |                                                                                                 | NCT03500991;<br>recruiting;<br>PI: Nicholas Vitanza                                                                                                           |         | Seattle Children's Hospital, USA                               |                                                                                                                                                                                                                                                                                                                                                                                                                            |
| HER2    | Her2+ malignancy                                                                                                                                                                                                          | *scFv-CD28/CD3ζ<br>*TGFβ dominant negative receptor (TGFβ resistant)<br>*EBV-specific through native TCR | retroviral    | iv                                           | single dose<br>level 1: 1x10 <sup>4</sup> cells/m <sup>2</sup><br>level 2: 3x10 <sup>4</sup> cells/m <sup>2</sup><br>level 5: 1x10 <sup>6</sup> cells/m <sup>2</sup><br>level 6: 3x10 <sup>6</sup> cells/m <sup>2</sup><br>level 7: 1x10 <sup>7</sup> cells/m <sup>2</sup><br>level 8: 3x10 <sup>7</sup> cells/m <sup>2</sup><br>level 9: 1x10 <sup>8</sup> cells/m <sup>2</sup>                                                                                                                                       | phase 1    | *actual enrollment: 20<br>*no preconditioning                                               |                                                                                                 | NCT00889954;<br>completed;<br>PI: Stephen Gottschalk                                                                                                          |         | *Baylor College of Medicine<br>*Texas Children's Hospital, USA |                                                                                                                                                                                                                                                                                                                                                                                                                            |
| HER2    | Glioblastoma                                                                                                                                                                                                              | 2nd generation                                                                                           | retroviral    | it or tumor resection cavity                 | dose escalation<br>-1x10 <sup>7</sup><br>-3x10 <sup>7</sup><br>-1x10 <sup>8</sup>                                                                                                                                                                                                                                                                                                                                                                                                                                      | phase 1    | *est. enrollment: 14                                                                        |                                                                                                 | NCT02442297;<br>recruiting;<br>PI: Nabil Ahmed                                                                                                                |         | *Baylor College of Medicine<br>*Texas Children's Hospital, USA |                                                                                                                                                                                                                                                                                                                                                                                                                            |
| HER2    | HER2+ brain or leptomeningeal metastases                                                                                                                                                                                  | *scFv-4-1BB/CD3ζ<br>*memory-enriched<br>*CD19t                                                           | ?             | intraventricular                             | 3 doses                                                                                                                                                                                                                                                                                                                                                                                                                                                                                                                | phase 1    | est. enrollment: 30                                                                         |                                                                                                 | NCT03696030;<br>recruiting;<br>PI: Jana Portnow                                                                                                               |         | City of Hope Medical Center, USA                               |                                                                                                                                                                                                                                                                                                                                                                                                                            |
| HER2    | HER2+ glioblastoma multiforme                                                                                                                                                                                             | *scFv-CD28/CD3ζ<br>*in CMV-specific T cells selected                                                     | retroviral    | iv                                           | *one dose:-1x10 <sup>6</sup> /m <sup>2</sup> , or-3x10 <sup>6</sup> /m <sup>2</sup> , or -1x10 <sup>7</sup> /m <sup>2</sup> , or-3x10 <sup>7</sup> /m <sup>2</sup> , or-1x10 <sup>8</sup> /m <sup>2</sup><br>*if beneficial, patient can get up to 6 additional same doses                                                                                                                                                                                                                                             | phase 1    | *actual enrollment: 16<br>*no preconditioning                                               | 1/16 PR, 7/16 SD, 8/16 PD                                                                       | NCT01109095;<br>Completed;<br>PI: Ahmed                                                                                                                       | [45-47] | *Baylor College of Medicine<br>*Texas Children's Hospital, USA | *No severe adverse effects or cytokine release syndrome within the used doses<br>*On-target/off-tumor toxicity: no                                                                                                                                                                                                                                                                                                         |
| HER2    | Breast cancer                                                                                                                                                                                                             | scFv-CD28/CD3ζ                                                                                           | retroviral    | ?                                            | ?                                                                                                                                                                                                                                                                                                                                                                                                                                                                                                                      | phase I/II | *actual enrollment: 60<br>*preconditioning                                                  |                                                                                                 | NCT02547961;<br>completed;<br>PI: Lizhi Niu                                                                                                                   |         | Fuda Cancer Hospital, Guangzhou, China                         |                                                                                                                                                                                                                                                                                                                                                                                                                            |
| HER2    | *Breast,<br>*ovarian,<br>*lung,<br>*gastric,<br>*colorectal,<br>*glioma,<br>*pancreatic                                                                                                                                   | ?                                                                                                        | ?             | ?                                            | determine MTD                                                                                                                                                                                                                                                                                                                                                                                                                                                                                                          | phase 1/2  | est. enrollment: 60                                                                         |                                                                                                 | NCT02713984;<br>Withdrawn (Reform CAR structure due to safety consideration);<br>PI: Cheng Qian                                                               |         | Southwest Hospital, China                                      |                                                                                                                                                                                                                                                                                                                                                                                                                            |
| HER2    | Advanced sarcoma                                                                                                                                                                                                          | *scFv-CD28/CD3ζ<br>*scFv based on FRP5                                                                   | retroviral    | iv                                           | DLTDose levels of 1x10 <sup>9</sup> /m <sup>2</sup> to 1x10 <sup>9</sup> /m <sup>2</sup> with or without lymphodepletion                                                                                                                                                                                                                                                                                                                                                                                               | phase 1    | *est. enrollment: 36<br>*lymphodepletion: fludarabine with or without cyclophosphamide      | *without preconditioning: 4/17 SD, 12/17 PD, 1/17 PR<br>*with preconditioning: 2/10 CR, 3/10 SD | NCT00902044;<br>Active, not recruiting;<br>PI: Nabil Ahmed                                                                                                    | [48-50] | Baylor College of Medicine, USA                                | *well tolerated, no systemic side effects<br>*Fever observed in 1 patient*On-target/off-tumor toxicity: no                                                                                                                                                                                                                                                                                                                 |
| ICAM1   | *Anaplastic thyroid cancer*Thyroid cancer                                                                                                                                                                                 | *AIC100<br>*no scFv, but I-domain of CD11a of LFA-1, linked to CD8TM-CD28/4-1BB/CD3ζ                     | transfection? | iv                                           | *Cohort -1 AIC100 Cell Dose Level -1 (Flat Dose): 1 x 10 <sup>6</sup> cells<br>*Cohort 1 AIC100 Cell Dose Level 1 (Flat Dose): 1 x 10 <sup>7</sup> cells<br>*Cohort 2 AIC100 Cell Dose Level 2 (Flat Dose): 1 x 10 <sup>8</sup> cells<br>*Cohort 3 AIC100 Cell Dose Level 3 (Flat Dose): 5 x 10 <sup>8</sup> cells                                                                                                                                                                                                     | phase 1    | *est. enrollment: 24<br>*lymphodepleting therapy                                            |                                                                                                 | NCT04420754;<br>not yet recruiting;<br>PI: Koen van Besien                                                                                                    |         | Weill Medical College of Cornell University, USA               |                                                                                                                                                                                                                                                                                                                                                                                                                            |



| Antigen    | Cancer                                                                                                                                                         | CAR type /add-ons                                                                                                                                                                    | CAR transfer                                    | Mode of injection                                                                                                                                                                                        | Number of cells                                                                                                                                                                                                                                                                                                                                                                                                      | Phase         | Patient # /pretreatment /other drugs                                                             | Outcome                                                                                                                                                                                                                                                                                                                                                      | NCT# /Status /PI                                         | Ref       | Origin                                                                     | Adverse events                                                                                                                                                                                                                                            |
|------------|----------------------------------------------------------------------------------------------------------------------------------------------------------------|--------------------------------------------------------------------------------------------------------------------------------------------------------------------------------------|-------------------------------------------------|----------------------------------------------------------------------------------------------------------------------------------------------------------------------------------------------------------|----------------------------------------------------------------------------------------------------------------------------------------------------------------------------------------------------------------------------------------------------------------------------------------------------------------------------------------------------------------------------------------------------------------------|---------------|--------------------------------------------------------------------------------------------------|--------------------------------------------------------------------------------------------------------------------------------------------------------------------------------------------------------------------------------------------------------------------------------------------------------------------------------------------------------------|----------------------------------------------------------|-----------|----------------------------------------------------------------------------|-----------------------------------------------------------------------------------------------------------------------------------------------------------------------------------------------------------------------------------------------------------|
| IL13Rα2    | r/r glioblastoma                                                                                                                                               | *IL13 (E13Y)-hinge-optimized-4-1BB/CD3ζ (no scFv, but binding-optimized IL-13)<br>*truncated CD19                                                                                    | ?                                               | icr, intraventricular /icr, it                                                                                                                                                                           | ?                                                                                                                                                                                                                                                                                                                                                                                                                    | phase 1       | *est. enrollment: 60<br>*with and without nivo and ipi before or after CAR-T application         |                                                                                                                                                                                                                                                                                                                                                              | NCT04003649; recruiting; PI: Behnam Badie                |           | City of Hope Medical Center, USA                                           |                                                                                                                                                                                                                                                           |
| IL13Rα2    | Refractory malignant glioma                                                                                                                                    | *IL13(E13Y)-CD3ζ<br>*Hy/TK selection/suicide                                                                                                                                         | DNA electroporation, followed by drug selection | icr                                                                                                                                                                                                      | *Up to 12 local infusions<br>*max. dose 10 <sup>8</sup><br>*1.6x10 <sup>8</sup> for first cycle +3x10 <sup>8</sup> for second to fourth cycle (split dose in each cycle; 3 infusions 2 days apart)                                                                                                                                                                                                                   | phase 1       | *actual enrollment: 3<br>*no preconditioning                                                     | *Brown et al. 2015: 3 patients, IL13(E13Y-zetakine)(scFv-CD3ζ) CD8+ T cells. Transient glioma responses observed in 2 of 3. Reduced IL13Rα2 expression after treatment (1P). Increase in tumor necrotic volume (1P).                                                                                                                                         | NCT00730613; completed; PI: Stephen Forman               | [151,152] | City of Hope Medical Center, USA                                           | *Well tolerated with manageable temporary brain inflammation.<br>*Grade 3 headache in two patients receiving 10 <sup>8</sup> CAR-T cells.<br>*Grade 3 neurologic adverse events observed in 1 patient.<br>*On-target/off-tumor toxicity: neurologic event |
| IL13Rα2    | Stage III or stage IV malignant glioma                                                                                                                         | GRm13Z40-2, an glucocorticoid-receptor-depleted allogeneic CD8+ cytolytic T-cell line expressing:<br>*IL13(E13Y)-CD3ζ<br>*Hy/TK selection/suicide<br>*[ <sup>18</sup> F]FHBG labeled | genetically modified?                           | it                                                                                                                                                                                                       | ?                                                                                                                                                                                                                                                                                                                                                                                                                    | phase 1       | *actual enrollment: 6<br>*with IL-2                                                              | [18F]FHBG gene reporter allowed longitudinal imaging of intratumoral CAR-T                                                                                                                                                                                                                                                                                   | NCT01082926; completed; PI: Behnam Badie                 | [153]     | City of Hope Medical Center, USA                                           |                                                                                                                                                                                                                                                           |
| IL13Rα2    | Stage IIIC or IV melanoma                                                                                                                                      | *IL13(E13Y)-hinge-optimized-4-1BB/CD3ζ<br>*truncated CD19                                                                                                                            | lentiviral                                      | iv                                                                                                                                                                                                       | Dose escalation                                                                                                                                                                                                                                                                                                                                                                                                      | phase 1       | *est. enrollment 24<br>*nonmyeloablative conditioning (cy+flu)<br>*w/ or w/o IL-2 subcutaneously |                                                                                                                                                                                                                                                                                                                                                              | NCT04119024; Suspended (SAE review) ; PI: Anusha Kalbasi |           | UCLA / Jonsson Comprehensive Cancer Center, USA                            |                                                                                                                                                                                                                                                           |
| IL13Rα2    | Refractory malignant glioma                                                                                                                                    | *IL13(E13Y)-hinge-optimized-4-1BB/CD3ζ<br>*truncated CD19<br>*memory enriched cells (Tcm)!                                                                                           | lentiviral (self-inactivating)                  | *stratum 1: it<br>*stratum 2: ic<br>*stratum 3: intraventricular<br>*stratum 4: dual delivery (it + intraventricular)<br>*stratum 5: dual delivery (naive and memory T cells, via it + intraventricular) | *determine MTD and a recommended phase II dosing plan (RP2D)                                                                                                                                                                                                                                                                                                                                                         | phase 1       | *est. enrollment: 92<br>*no pretreatment                                                         | Brown et al. 2016: Report on one patient: local control after intracavitary administration of 6 cycles of IL13-4-1BB/CD3ζ-CAR T. Distant disease foci progressed. After 5 additional cycles (intraventricular): all tumors and metastases decreased by 77-100%. Response lasted 7.5 months, then four new lesions. (probably due to IL13Rα2 downregulation). | NCT02208362; recruiting; PI: Behnam Badie                | [154]     | City of Hope Medical Center, USA                                           | No CAR-T cell infusion related toxic effects of grade 3 or higher were observed<br>*Headaches, generalized fatigue, myalgia, olfactory auras<br>*On-target/off-tumor toxicity: no                                                                         |
| Lewis Y    | Solid tumors                                                                                                                                                   | scFv-CD28/CD3ζ                                                                                                                                                                       | transduction ?                                  | iv                                                                                                                                                                                                       | MTD; single infusion 4 dose levels, each with 3 patients<br>*5 patients will get Indium <sup>111</sup> -labeled T cells for tracking<br>*dose levels:-1 (if needed): 1x10 <sup>8</sup><br>1: 2x10 <sup>8</sup><br>2: 5x10 <sup>8</sup><br>3: 1x10 <sup>9</sup><br>4: 5x10 <sup>9</sup>                                                                                                                               | phase 1       | *est. enrollment: 30<br>*cy+flu                                                                  |                                                                                                                                                                                                                                                                                                                                                              | NCT03851146; recruiting; PI: Ben Solomon                 |           | Peter MacCallum Cancer Centre, Melbourne, Australia                        |                                                                                                                                                                                                                                                           |
| LMP1 (EBV) | Nasopharyngeal carcinoma                                                                                                                                       | ?                                                                                                                                                                                    | ?                                               | ?                                                                                                                                                                                                        | ?                                                                                                                                                                                                                                                                                                                                                                                                                    | phase 1/2     | *est. enrollment: 20                                                                             |                                                                                                                                                                                                                                                                                                                                                              | NCT02980315; unknown; PI: not provided                   |           | Second Hospital of Nanjing Medical University, China                       |                                                                                                                                                                                                                                                           |
| mesothelin | *Non-small-cell Lung Cancer<br>*Mesothelioma                                                                                                                   | *αPD1-MSLN-CAR T cells<br>*secreting PD1 nanobodies                                                                                                                                  | ?                                               | iv                                                                                                                                                                                                       | *standard 3+3 dose escalation, single dose<br>*1×10 <sup>8</sup> CAR+ T cells/kg,<br>*3×10 <sup>8</sup> CAR+ T cells/kg,<br>*1×10 <sup>6</sup> CAR+ T cells/kg,<br>*3×10 <sup>6</sup> CAR+ T cells/kg                                                                                                                                                                                                                | early phase 1 | *est. enrollment: 10<br>*cyclophosphamide                                                        |                                                                                                                                                                                                                                                                                                                                                              | NCT04489862; recruiting; PI: Xiaorong Dong               |           | *Shanghai Cell Therapy Group Co.,Ltd<br>*Wuhan Union Hospital, China       |                                                                                                                                                                                                                                                           |
| mesothelin | r/r epithelial ovarian cancer                                                                                                                                  | ?                                                                                                                                                                                    | retroviral                                      | ?                                                                                                                                                                                                        | ?                                                                                                                                                                                                                                                                                                                                                                                                                    | phase 1/2     | *est. enrollment: 20<br>*cy+flu                                                                  |                                                                                                                                                                                                                                                                                                                                                              | NCT03916679; recruiting; PI: Jianwei Zhou                |           | Second Affiliated Hospital, School of Medicine, Zhejiang University, China |                                                                                                                                                                                                                                                           |
| mesothelin | r/r ovarian cancer                                                                                                                                             | 4th generation                                                                                                                                                                       | transduction ?                                  | ?                                                                                                                                                                                                        | 5x10 <sup>9</sup> /kg once at day 1                                                                                                                                                                                                                                                                                                                                                                                  | early phase 1 | *est. enrollment: 10<br>*cy+flu                                                                  |                                                                                                                                                                                                                                                                                                                                                              | NCT03814447; recruiting; PI: Hui Zhao                    |           | Shanghai 6th People's Hospital, China                                      |                                                                                                                                                                                                                                                           |
| mesothelin | r/r ovarian cancer                                                                                                                                             | ?                                                                                                                                                                                    | retroviral                                      | ?                                                                                                                                                                                                        | ?                                                                                                                                                                                                                                                                                                                                                                                                                    | early phase 1 | *est. enrollment: 20<br>*cy+flu                                                                  |                                                                                                                                                                                                                                                                                                                                                              | NCT03799913; recruiting; PI: Jianwei Zhou                |           | Zhejiang University, China                                                 |                                                                                                                                                                                                                                                           |
| mesothelin | Mesothelin+ multiple solid tumors                                                                                                                              | PD-1 gene knocked out (CRISPR/Cas9)!                                                                                                                                                 | ?                                               | ?                                                                                                                                                                                                        | dose escalation 3+3                                                                                                                                                                                                                                                                                                                                                                                                  | phase 1       | *est. enrollment: 10<br>*paclitaxel and cyclophosphamide                                         |                                                                                                                                                                                                                                                                                                                                                              | NCT03747965; recruiting; PI: Weidong Han                 |           | Chinese PLA General Hospital, China                                        |                                                                                                                                                                                                                                                           |
| mesothelin | Mesothelin expressing cancers:<br>*lung adenocarcinoma,<br>*ovarian,<br>*peritoneal,<br>*fallopian tube,<br>*mesothelioma pleural,<br>*mesothelioma peritoneum | *scFv-4-1BB/CD3ζ<br>*scFv based on SS1                                                                                                                                               | lentiviral                                      | iv, ip                                                                                                                                                                                                   | *cohort 1 single dose 1-3x10 <sup>7</sup> /m <sup>2</sup> w/o cyclo<br>*cohort 2: single dose 1-3x10 <sup>7</sup> /m <sup>2</sup> w/ cyclo<br>*cohort 3: single dose 1-3x10 <sup>9</sup> /m <sup>2</sup> w/o cyclo<br>*cohort 4: single dose 1-3x10 <sup>9</sup> /m <sup>2</sup> w/ cyclo<br>*cohort 5: single dose 1-3x10 <sup>7</sup> /m <sup>2</sup> w/o cyclo IP<br>*3+3 dose escalation design to determine MTD | phase 1       | *est. enrollment: 30<br>*with and w/o cyclophosphamide                                           | In Tanyi et al.: Ovarian cancer single dose 3x10 <sup>7</sup> /m <sup>2</sup> w/o cyclo, 1/1 CR                                                                                                                                                                                                                                                              | NCT03054298; Active, not recruiting; PI: Janos L Tanyi   | [241]     | Upenn, USA                                                                 | Fever, high volume pleural fluid                                                                                                                                                                                                                          |
| mesothelin | HER2-negative, mesothelin-positive breast cancer                                                                                                               | *iCasp9<br>*scFv based on m912                                                                                                                                                       | ?                                               | iv                                                                                                                                                                                                       | MTD; dose escalation 3+3, single dose per patient                                                                                                                                                                                                                                                                                                                                                                    | phase 1       | *est. enrollment: 24<br>*cyclophosphamide                                                        |                                                                                                                                                                                                                                                                                                                                                              | NCT02792114; recruiting; PI: Prasad Adusumilli           |           | MSKCC, USA                                                                 |                                                                                                                                                                                                                                                           |

| Antigen    | Cancer                                                                                                                                                                                                          | CAR type /add-ons                                                                      | CAR transfer            | Mode of injection          | Number of cells                                                                                                                                                                                                                                                                                                                   | Phase         | Patient # /pretreatment /other drugs                                                                                                                                                 | Outcome                                                     | NCT# /Status /PI                                                                                             | Ref   | Origin                                                               | Adverse events |
|------------|-----------------------------------------------------------------------------------------------------------------------------------------------------------------------------------------------------------------|----------------------------------------------------------------------------------------|-------------------------|----------------------------|-----------------------------------------------------------------------------------------------------------------------------------------------------------------------------------------------------------------------------------------------------------------------------------------------------------------------------------|---------------|--------------------------------------------------------------------------------------------------------------------------------------------------------------------------------------|-------------------------------------------------------------|--------------------------------------------------------------------------------------------------------------|-------|----------------------------------------------------------------------|----------------|
| mesothelin | Mesothelin+ advanced solid tumor                                                                                                                                                                                | PD-1 antibody expressing                                                               | ?                       | iv                         | two cycles                                                                                                                                                                                                                                                                                                                        | phase 1/2     | *est. enrollment: 50<br>*cy+flu                                                                                                                                                      |                                                             | NCT03615313; recruiting,;<br>PI: Juemin Fang, Song Gao, Yianling Guo, Hui Wang, Zhongzheng Zhu, Jianhua Chen |       | Shanghai 10th People's Hospital, China                               |                |
| mesothelin | Mesothelin+ multiple solid tumors                                                                                                                                                                               | Allogeneic cells, CRISPR-Cas9-mediated PD-1 and TCR gene-knocked out                   | ?                       | ?                          | Dose escalation, 3+3 dose escalation approach                                                                                                                                                                                                                                                                                     | phase 1       | *est. enrollment: 10<br>*conditioning regimen                                                                                                                                        |                                                             | NCT03545815; recruiting;<br>PI: Han Weidong                                                                  |       | Chinese PLA General Hospital, China                                  |                |
| mesothelin | Mesothelin+ advanced malignancies (adults)                                                                                                                                                                      | PD1 antibody expressing                                                                | ?                       | iv                         | dose escalation                                                                                                                                                                                                                                                                                                                   | phase 1/2     | *est. enrollment: 40                                                                                                                                                                 |                                                             | NCT03030001; unknown;<br>PI: Qijun Qian                                                                      |       | Shanghai Cell Therapy Engineering Research Institute, China          |                |
| mesothelin | Recurrent or metastatic malignant tumors                                                                                                                                                                        | ?                                                                                      | ?                       | ?                          | dose escalation<br>5x10 <sup>4</sup> /kg-1x10 <sup>7</sup> /kg                                                                                                                                                                                                                                                                    | phase 1       | *est. enrollment: 20<br>*cyclophosphamide                                                                                                                                            |                                                             | NCT02930993; unknown;<br>PI: Jinwen Sun                                                                      |       | China Meitan General hospital, China                                 |                |
| mesothelin | Mesothelin+ advanced solid tumors                                                                                                                                                                               | CTLA-4 and PD-1 antibodies expressing                                                  | ?                       | iv                         | 2-5x10 <sup>7</sup> cells/kg                                                                                                                                                                                                                                                                                                      | phase 1/2     | *est. enrollment: 40<br>*cyclophosphamide                                                                                                                                            |                                                             | NCT03182803; unknown;<br>PI: Jiangtao Wang                                                                   |       | Ningbo No.5 Hospital, China                                          |                |
| mesothelin | Relapsed and/or chemotherapy refractory advanced malinancies:<br>*malignant mesothelioma,<br>*pancreatic cancer,<br>*ovarian,<br>*triple negative breast,<br>*endometrial,<br>*other mesothelin positive tumors | scFv-4-1BB/CD3ζ                                                                        | retroviral              | ?                          | dose escalation 3+3                                                                                                                                                                                                                                                                                                               | phase 1       | *est. enrollment: 20                                                                                                                                                                 |                                                             | NCT02580747; unknown;<br>PI: Han Weidong                                                                     |       | Chinese PLA General Hospital, China                                  |                |
| mesothelin | MSTL+ metastatic cancer:<br>*cervical,<br>*pancreatic,<br>*ovarian,<br>*lung cancer,<br>*mesothelioma                                                                                                           | ?                                                                                      | retroviral              | iv                         | Phase 1: dose escalation until MTD determined, then phase 2<br>Phase 2 not reached<br>D1: 1x10 <sup>6</sup><br>D2: 3x10 <sup>6</sup><br>D3: 1x10 <sup>7</sup><br>D4: 3x10 <sup>7</sup><br>D5: 1x10 <sup>8</sup>                                                                                                                   | phase 1/2     | *est. enrollment: 136<br>*actual recruitment: 15<br>*non-myeoablative, but lymphoid depleting regimen (cy+flu)<br>*co-treatment: low-dose aldesleukin (IL-2, also iv (72,000IU/kg)); | *1 SD (DL: 3x10*)<br>*all other 14 PD<br>*not that many SAE | NCT01583686; Terminated (Study terminated due to slow/insufficient accrual.);<br>PI: SA Rosenberg            |       | NCI, NIH, USA                                                        |                |
| mesothelin | Mesothelin expressing cancers:<br>*metastatic pancreatic,<br>*serous epithelial ovarian,<br>*pleural mesothelioma                                                                                               | *scFv-4-1BB/CD3ζ<br>*scFv based on SS1                                                 | lentiviral              | iv                         | 1-3x10 <sup>7</sup> /m <sup>2</sup> (cohort 1 and 2)<br>1-3x10 <sup>9</sup> /m <sup>2</sup> (cohort 3 and 4)                                                                                                                                                                                                                      | phase 1       | *19<br>*with and without cyclophosphamide                                                                                                                                            | *treatment well tolerated<br>*6 of 6 SD                     | NCT02159716; completed;<br>PI: Haas                                                                          | [242] | Upenn, USA                                                           |                |
| mesothelin | Pancreatic cancer                                                                                                                                                                                               | *scFv-4-1BB/CD3ζ<br>*scFv based on SS1<br>*combined with anti-CD19 scFv-4-1BB/CD3ζ CAR | lentiviral              | iv                         | 1-3x10 <sup>7</sup> /m <sup>2</sup> (cohort 1) or 1-3x10 <sup>9</sup> /m <sup>2</sup> (cohort 2) CAR-T-positive cells                                                                                                                                                                                                             | phase 1       | *actual enrollment: 4<br>*cyclophosphamide                                                                                                                                           |                                                             | NCT02465983; Terminated (Lack of efficacy and funding to continue investigation);<br>PI: Ko                  |       | *Upenn<br>*University of California, San Francisco, USA              |                |
| mesothelin | Metastatic pancreatic cancer                                                                                                                                                                                    | scFv-4-1BB/CD3ζ                                                                        | lentiviral              | ?                          | dose escalation (DLT)<br>cohort 1: single dose of 1-3x10 <sup>7</sup> /m <sup>2</sup> CAR+ cells<br>cohort 2: single dose of 1-3x10 <sup>9</sup> /m <sup>2</sup> CAR+ cells                                                                                                                                                       |               | *est. enrollment: 10<br>*one dose of cyclophosphamide                                                                                                                                |                                                             | NCT03638193; recruiting;<br>PI: Jinfei Chen                                                                  |       | The first affiliated hospital with Nanjing medical university, China |                |
| mesothelin | Malignant pleural disease:<br>*mesothelioma,<br>*metastatic lung,<br>*breast cancers                                                                                                                            | *scFv-CD28/CD3ζ<br>*iCasp9                                                             | genetically engineered? | ip                         | *dose escalation<br>*maximum dose of 6x10 <sup>7</sup> cells/kg, or until MTD is reached                                                                                                                                                                                                                                          | phase 1       | *est. enrollment: 48<br>*with and without cyclophosphamide                                                                                                                           | 2/14 CR, 5/14 PR, 4/14 SD                                   | NCT02414269; recruiting;<br>PI: Adusumilli                                                                   | [243] | MSKCC, USA                                                           |                |
| mesothelin | Pancreatic cancer                                                                                                                                                                                               | humanized scFv                                                                         | lentiviral              | iv                         | DLT, 3 cohorts, 3+3 dose escalation design<br>*cohort 1: single dose 1-3x10 <sup>7</sup> /m <sup>2</sup> cells, without cyclophosphamide<br>*cohort 2: single dose 1-3x10 <sup>9</sup> /m <sup>2</sup> cells, without cyclophosphamide<br>*cohort 3: single dose 1-3x10 <sup>9</sup> /m <sup>2</sup> cells, with cyclophosphamide | phase 1       | *est. enrollment: 18<br>*with and without cyclophosphamide                                                                                                                           |                                                             | NCT03323944; Active, not recruiting ;<br>PI: Mark O'Hara                                                     |       | Upenn, USA                                                           |                |
| mesothelin | Advanced pancreatic carcinoma                                                                                                                                                                                   | scFv-4-1BB/CD3ζ                                                                        | transduction ?          | vascular intervention, TAI | 1-10x10 <sup>6</sup> mesoCAR positive T cells/kg                                                                                                                                                                                                                                                                                  | phase 1       | *est. enrollment: 30<br>*cyclophosphamide                                                                                                                                            |                                                             | NCT02706782; unknown;<br>PI: Xu Aimin                                                                        |       | Renji Hospital, China                                                |                |
| mesothelin | Pancreatic cancer                                                                                                                                                                                               | *murine-derived scFv-4-1BB/CD3ζ<br>*CD19 -CAR                                          | lentiviral              | pa or iv                   | ?                                                                                                                                                                                                                                                                                                                                 | early phase 1 | *est. enrollment: 10<br>*cyclophosphamide                                                                                                                                            |                                                             | NCT03497819; active, not recruiting;<br>PI: Mengtao Zhou                                                     |       | First affiliated hospital of Wenzhou medical university, China       |                |

| Antigen                        | Cancer                                                                                                                                                  | CAR type /add-ons                                                       | CAR transfer            | Mode of injection | Number of cells                                                                                                                                                                                                                                                                                                                                                                       | Phase     | Patient # /pretreatment /other drugs                                                                                              | Outcome                                                                                                                                                                                                                                                                                                                                                                                                                                                                                                                                                                                                                                                                                                                                                                                                                                                                                                                                                                                                                                               | NCT# /Status /PI                                    | Ref       | Origin                                                                              | Adverse events                                                                                                                                                                                                                                                                                                                                  |
|--------------------------------|---------------------------------------------------------------------------------------------------------------------------------------------------------|-------------------------------------------------------------------------|-------------------------|-------------------|---------------------------------------------------------------------------------------------------------------------------------------------------------------------------------------------------------------------------------------------------------------------------------------------------------------------------------------------------------------------------------------|-----------|-----------------------------------------------------------------------------------------------------------------------------------|-------------------------------------------------------------------------------------------------------------------------------------------------------------------------------------------------------------------------------------------------------------------------------------------------------------------------------------------------------------------------------------------------------------------------------------------------------------------------------------------------------------------------------------------------------------------------------------------------------------------------------------------------------------------------------------------------------------------------------------------------------------------------------------------------------------------------------------------------------------------------------------------------------------------------------------------------------------------------------------------------------------------------------------------------------|-----------------------------------------------------|-----------|-------------------------------------------------------------------------------------|-------------------------------------------------------------------------------------------------------------------------------------------------------------------------------------------------------------------------------------------------------------------------------------------------------------------------------------------------|
| Mesothelin                     | *Malignant pleural mesotheliomas (MPM)<br>*Metastatic pancreatic cancer (PDA)                                                                           | *scFv-4-1BB/CD3ζ<br>*scFv based on ss1 (murine Ab)                      | mRNA-transfection       | iv, it            | *In Beatty et al., 2014:<br>*MPM: 1x10 <sup>8</sup> iv, 1x10 <sup>9</sup> iv, 1x10 <sup>8</sup> iv<br>*PDA: 8 times 3x10 <sup>8</sup> /m <sup>2</sup> iv over 18 days, then 2 times 2x10 <sup>8</sup> i.t.<br>*In Maus et al.,: cohort 1: 1x10 <sup>8</sup> iv day 0 then 1x10 <sup>9</sup> iv day 7<br>cohort 2: 1x10 <sup>8</sup> iv day 0,2,4 then 1x10 <sup>9</sup> iv day 7,9,11 | phase 1   | In Beatty et al., 2014:<br>*2 case reports of ongoing trial<br>*no lymphodepletion<br>In Maus et al.,: *18<br>*pretreatment: none | In Beatty et al., 2014:<br>*Cells migrated to primary and metastatic tumor sites<br>*Clinical and laboratory evidence of antitumor activity in both patients<br>*Cell elicited antitumor immune response revealed by the development of novel anti-self antibodies<br>*Induction of (humoral) epitope spreading<br>*no evidence of off-tumor on-target toxicity against normal tissues<br>*2/2SD<br>*Note: MPM patient hat adverse events: cardiac arrest respiratory failure disseminated intravenous coagulation, cytokine release syndrom at study day 42 (= within 24h of last infusion!) is the same patient as described in Maus et al.<br>In Maus et al.,: *In one out of 4 patiens anaphylaxis and cardiac arrest within minutes of completing the third infusion<br>*CAR based on murine antibody; probably AE caused by IgE antibodies specific to the CAR<br>*CARs based on murine antibodies may be a safety issue for mRNA CARs, especially when administered using an intermittent dosing schedule<br>*1/4 CR, 1/4 PD, 2/4 SD, 1/4 died | NCT01355965; completed; PI: Haas                    | [223,225] | Upenn, USA                                                                          | *One patient reported minimal arthralgia and fatigue<br>*Anaphylactic reaction in one patient, leading to grade 4 cardiac arrest, respiratory failure, disseminated intravenous coagulation, and CRS<br>*Grade 4 jejunal obstruction, grade 3 abdominal pain, and grade 2 lymphcytosis for another patient<br>*On-target/off-tumor toxicity: no |
| Mesothelin                     | *Metastatic pancreatic cancer (PDA) (pancreatic ductal adenocarcinoma (PDAC))                                                                           | *scFv-4-1BB/CD3ζ<br>*scFv based on ss1 (murine Ab)                      | mRNA-transfection       | iv, it            | 1 to 3x10 <sup>8</sup> /m <sup>2</sup> , three times weekly, for three weeks                                                                                                                                                                                                                                                                                                          | phase 1   | *16<br>*pretreatment: none                                                                                                        | *no cytokine release syndrome<br>*no dose-limiting toxicities<br>*SD in 2 patients<br>*total metabolic active volume (MAV) remained stable in 3 patients and decreased by 69.2% in 1 patient                                                                                                                                                                                                                                                                                                                                                                                                                                                                                                                                                                                                                                                                                                                                                                                                                                                          | NCT01897415; completed; PI: Beatty                  | [224]     | Upenn, USA                                                                          | *Grade > 3 toxicities included abdominal pain (1) and backpain (1)<br>*On-target/off-tumor toxicity: no                                                                                                                                                                                                                                         |
| mesothelin                     | *Advanced ovarian cancer<br>*Peritoneal mesothelioma                                                                                                    | MCY-M11                                                                 | mRNA-transfection       | ip                | dose escalation<br>3 weekly doses                                                                                                                                                                                                                                                                                                                                                     | phase 1   | est. enrollment: 15                                                                                                               |                                                                                                                                                                                                                                                                                                                                                                                                                                                                                                                                                                                                                                                                                                                                                                                                                                                                                                                                                                                                                                                       | NCT03608618; recruiting; PI: Claudio Dansky Ullmann |           | Maxcyte Inc., USA                                                                   |                                                                                                                                                                                                                                                                                                                                                 |
| MG7 (glycosylased form of CEA) | MG7+ liver metastases                                                                                                                                   | scFv-4-1BB/CD3ζ                                                         | transduction ?          | it                | 1-6x10 <sup>8</sup> CAR+ T cells                                                                                                                                                                                                                                                                                                                                                      | phase 1/2 | *est. enrollment: 20<br>*cyclophosphamide                                                                                         |                                                                                                                                                                                                                                                                                                                                                                                                                                                                                                                                                                                                                                                                                                                                                                                                                                                                                                                                                                                                                                                       | NCT02862704; unknown; PI: Yongzhan Nie              |           | Xijing Hospital of digestive diseases, China                                        |                                                                                                                                                                                                                                                                                                                                                 |
| MUC1                           | Esophageal cancer                                                                                                                                       | PD-1 knockout                                                           | ?                       | ?                 | ?                                                                                                                                                                                                                                                                                                                                                                                     | phase 1/2 | est. enrollment: 20                                                                                                               |                                                                                                                                                                                                                                                                                                                                                                                                                                                                                                                                                                                                                                                                                                                                                                                                                                                                                                                                                                                                                                                       | NCT03706326; recruiting; PI: not provided           |           | The first affiliated hospital of Guangdong Pharmaceutical University, China         |                                                                                                                                                                                                                                                                                                                                                 |
| MUC1                           | Intrahepatic cholangiocarcinoma                                                                                                                         | ?                                                                       | ?                       | ?                 | ?                                                                                                                                                                                                                                                                                                                                                                                     | phase 1/2 | *est. enrollment: 9<br>*cy+flu                                                                                                    |                                                                                                                                                                                                                                                                                                                                                                                                                                                                                                                                                                                                                                                                                                                                                                                                                                                                                                                                                                                                                                                       | NCT03633773; recruiting; PI: not provided           |           | Second Affiliated Hospital, School of Medicine, Zhejiang University, China          |                                                                                                                                                                                                                                                                                                                                                 |
| MUC1                           | MUC1+ advanced solid tumors                                                                                                                             | CTLA-4 and PD-1 antibodies expressing                                   | genetically engineered? | iv                | 2-5x10 <sup>7</sup> cells/kg                                                                                                                                                                                                                                                                                                                                                          | phase 1/2 | *est. enrollment: 40<br>*cyclophosphamide                                                                                         |                                                                                                                                                                                                                                                                                                                                                                                                                                                                                                                                                                                                                                                                                                                                                                                                                                                                                                                                                                                                                                                       | NCT03179007; unknown; PI: Jiangtao Wang             |           | Ningbo No.5 Hospital, China                                                         |                                                                                                                                                                                                                                                                                                                                                 |
| MUC1                           | NSCLC                                                                                                                                                   | PD1 knockout                                                            | genetically engineered? | infused?          | ?                                                                                                                                                                                                                                                                                                                                                                                     | phase 1/2 | est. enrollment: 60                                                                                                               |                                                                                                                                                                                                                                                                                                                                                                                                                                                                                                                                                                                                                                                                                                                                                                                                                                                                                                                                                                                                                                                       | NCT03525782; recruiting; PI: Size Chen              |           | First affiliated hospital of Guangdong Pharmaceutical University, China             |                                                                                                                                                                                                                                                                                                                                                 |
| MUC1                           | MUC1+ solid tumor:<br>*malignant glioma,<br>*colorectal,<br>*gastric                                                                                    | ?                                                                       | transduction ?          | infusion?         | ?                                                                                                                                                                                                                                                                                                                                                                                     | phase 1/2 | est. enrollment: 20                                                                                                               |                                                                                                                                                                                                                                                                                                                                                                                                                                                                                                                                                                                                                                                                                                                                                                                                                                                                                                                                                                                                                                                       | NCT02617134; unknown; PI: Lin Yang                  |           | *PersonGen BioTherapeutics (Suzhou)<br>*The first people's hospital of Hefei, China |                                                                                                                                                                                                                                                                                                                                                 |
| Muc1                           | MUC1+ advanced refractory solid tumor:<br>*hepatocellular carcinoma,<br>*NSCLC,<br>*pancreatic carcinoma,<br>*triple-negative invasive breast carcinoma | *scFv-CD28/4-1BB/CD3ζ<br>*scFv based on SM3 or pSM3                     | lentiviral              | it                | 5x10 <sup>5</sup> cells per lesion                                                                                                                                                                                                                                                                                                                                                    | phase 1/2 | est. enrollment: 20<br>*no preconditioning                                                                                        | *1/1 PR<br>*pSM3-CAR treated tumor lesion showed necrosis                                                                                                                                                                                                                                                                                                                                                                                                                                                                                                                                                                                                                                                                                                                                                                                                                                                                                                                                                                                             | NCT02587689; unknown; PI: Lin Yang                  | [244]     | *PersonGen BioTherapeutics (Suzhou)<br>*The first people's hospital of Hefei, China | *Mild headache, muscle pain, nasal congestion, and abdominal bloating discomfort, and a transient CRSwas experienced<br>*On-target/off-tumor toxicity: no                                                                                                                                                                                       |
| MUC16ecto                      | Recurrent MUC16ecto+ solid tumors:<br>*ovarian,<br>*peritoneal or<br>*fallopian tube                                                                    | *scFv-CD28/CD3ζ<br>*express also IL-12<br>*EGFRt<br>*scFv based on 4H11 | ?                       | iv and ip         | 3x10 <sup>5</sup> , 1x10 <sup>6</sup> , 3x10 <sup>6</sup> , 1x10 <sup>7</sup> CAR+ T cells/kg                                                                                                                                                                                                                                                                                         | phase 1   | *est. enrollment: 30<br>*cyclophosphamide with/without fludarabine                                                                |                                                                                                                                                                                                                                                                                                                                                                                                                                                                                                                                                                                                                                                                                                                                                                                                                                                                                                                                                                                                                                                       | NCT02498912; recruiting; PI: Roisin O'Cearbhaill    | [139]     | MSKCC, USA                                                                          |                                                                                                                                                                                                                                                                                                                                                 |
| Muc1* (cleaved form of Muc1)   | Breast cancer                                                                                                                                           | *scFv-CD8 hinge-4-1BB/CD3ζ<br>*huMNC2-CAR44<br>*humanized MNC2          | lentiviral              | ?                 | *MTD and RP2D<br>*3+3                                                                                                                                                                                                                                                                                                                                                                 | phase 1   | *est. enrollment: 69                                                                                                              |                                                                                                                                                                                                                                                                                                                                                                                                                                                                                                                                                                                                                                                                                                                                                                                                                                                                                                                                                                                                                                                       | NCT04020575; recruiting; PI: Jennifer M Specht      |           | Fred Hutchinson Cancer Research Center, USA                                         |                                                                                                                                                                                                                                                                                                                                                 |

| Antigen                                            | Cancer                                                                                                                                                           | CAR type /add-ons                                                                                                               | CAR transfer          | Mode of injection   | Number of cells                                                                                                                                                               | Phase     | Patient # /pretreatment /other drugs                                                                | Outcome                                                       | NCT# /Status /PI                                                                  | Ref       | Origin                                                                                                                                                             | Adverse events |
|----------------------------------------------------|------------------------------------------------------------------------------------------------------------------------------------------------------------------|---------------------------------------------------------------------------------------------------------------------------------|-----------------------|---------------------|-------------------------------------------------------------------------------------------------------------------------------------------------------------------------------|-----------|-----------------------------------------------------------------------------------------------------|---------------------------------------------------------------|-----------------------------------------------------------------------------------|-----------|--------------------------------------------------------------------------------------------------------------------------------------------------------------------|----------------|
| TnMuc1                                             | Advanced solid tumors:<br>*NSCLC,<br>*ovarian,<br>*fallopian tube,<br>*TNBC,<br>*pancreatic ductal adenocarcinoma and<br>*multiple myeloma                       | ?                                                                                                                               | ?                     | iv                  | dose escalation                                                                                                                                                               | phase 1   | *est. enrollment: 80<br>*lymphodepletion cy+flu                                                     |                                                               | NCT04025216;<br>Active, not recruiting;<br>PI: not provided                       |           | Tmunity Therapeutics, USA                                                                                                                                          |                |
| Nectin4/FAP                                        | Malignant solid tumors:<br>*NSCLC,<br>*breast,<br>*ovarian,<br>*bladder,<br>*pancreatic                                                                          | *4th generation<br>*IL-7 and CCL19 or/and IL-12 expressing                                                                      | ?                     | it                  | ?                                                                                                                                                                             | phase 1   | *est. enrollment: 30                                                                                |                                                               | NCT03932565;<br>recruiting;<br>PI: Bingmu Fang, M.D                               | [180-182] | *The Sixth Affiliated Hospital of Wenzhou Medical University<br>*Lishui Country People's Hospital, China                                                           |                |
| NKG2D-Ligands (MIC-A, MIC-B, and the ULBPs 1 to 6  | *Colorectal cancer<br>*TNBC<br>*Sarcoma<br>*Nasopharyngeal carcinoma<br>*Prostate cancer<br>*Gastric cancer                                                      | *Haplo/allogeneic gamma/delta T cells<br>*CTM-N2D-101                                                                           | ?                     | iv                  | *dose escalation<br>*four times weekly<br>*DL1: 3x10 <sup>8</sup><br>*DL2: 1x10 <sup>9</sup><br>*DL3: 3x10 <sup>9</sup>                                                       | phase 1   | *est. enrollment: 10                                                                                |                                                               | NCT04107142;<br>not yet recruiting;<br>PI: not provided                           |           | CytoMed Therapeutics Pte Ltd, Malaysia                                                                                                                             |                |
| NKG2D-Ligands (MIC-A, MIC-B, and the ULBPs 1 to 6) | Colorectal cancer with potentially resectable liver metastases                                                                                                   | NKG2D-CD3ζ (NKR-2)                                                                                                              | ?                     | iv                  | *Dose escalation and dose expansion<br>*3 dose levels, per dose 3 successive administrations two weeks apart                                                                  | phase 1   | *est. enrollment: 36<br>*concurrently with FOLFOX                                                   | multiple iv w/ concurrent FOLFOX: 1/3 PR                      | NCT03310008;<br>active, not recruiting;<br>PI: Frederic Lehmann                   | [42]      | Celyad, Belgium                                                                                                                                                    |                |
| NKG2D-Ligands (MIC-A, MIC-B, and the ULBPs 1 to 6) | Multiple cancer indications:<br>*colorectal,<br>*ovarian,<br>*bladder,<br>*triple-negative breast,<br>*pancreatic,<br>*myeloid leukemia and<br>*multiple myeloma | NKG2D-CD3ζ (NKR-2)                                                                                                              | ?                     | iv                  | *Dose escalation<br>*3 dose levels, per dose 3 successive administrations two weeks apart                                                                                     | phase 1/2 | *est. enrollment: 122<br>*w/ or w/o preconditioning                                                 | multiple iv w/o preconditioning: 4/14 SD (3 colon, 1 ovarian) | NCT03018405;<br>recruiting;<br>PI: Frederic Lehmann                               | [42,43]   | Celyad, Belgium/USA                                                                                                                                                |                |
| NKG2D-Ligands (MIC-A, MIC-B, and the ULBPs 1 to 6) | Non-resectable liver metastases from colorectal cancer                                                                                                           | NKG2D-CD3ζ (NKR-2)                                                                                                              | ?                     | iha                 | Multiple administrations;<br>dose escalation: 3 dose levels, per dose 3 successive HTAs two weeks apart                                                                       | phase 1   | *est. enrollment: 18                                                                                |                                                               | NCT03370198;<br>active, not recruiting;<br>PI: Frederic Lehmann                   |           | Celyad, Belgium                                                                                                                                                    |                |
| NKG2D-Ligands (MIC-A, MIC-B, and the ULBPs 1 to 6) | Colorectal cancer                                                                                                                                                | *Allogeneic NKG2D-based CYAD-101<br>*standard chemotherapy regimen and immunotherapy with allogenic CAR-T                       | ?                     | iv                  | *3 doses, dose escalation (3+3 design)<br>cohort 1: 1x10 <sup>8</sup> per injection<br>cohort 2: 3x10 <sup>8</sup> per injection<br>cohort 3: 1x10 <sup>9</sup> per injection | phase 1   | *est. enrollment: 36<br>*concurrently with FOLFOX                                                   |                                                               | NCT03692429;<br>recruiting;<br>PI: Fiona Thistlethwaite, Sophie Paoa, Richard Kim |           | Celyad, USA/UK                                                                                                                                                     |                |
| NKG2D-Ligands (MIC-A, MIC-B, and the ULBPs 1 to 6) | *HCC<br>*Glioblastoma<br>*Medulloblastoma<br>*Colon cancer                                                                                                       | *KD-025 CAR T-cells<br>*NKG2D-CD8 hinge/TM-4-1BB/CD3ζ                                                                           | transduction<br>?     | iv or HPA injection | Dosage:1-10x10 <sup>6</sup> /kg, 70ml/time, over 20-30 minutes; single injection                                                                                              | Phase 1/2 | est. enrollment: 10                                                                                 |                                                               | NCT04270461;<br>not yet recruiting;<br>PI: Changchun Cai                          |           | Affiliated hospital of jiujiang university, Jiujiang, Jiangxi, China                                                                                               |                |
| Ovarian cancer                                     | Ovarian cancer                                                                                                                                                   | IgT cells (modified with immune modulatory genes such as genes encoding immune checkpoint inhibitors; PD1 and PD-L1 antibodies) | ?                     | iv or it            | ?                                                                                                                                                                             | phase 1/2 | *est. enrollment: 100                                                                               |                                                               | NCT03184753;<br>recruiting;<br>PI: Lung-Ji Chang                                  |           | Shenzhen Geno-Immune Medical Institute, China                                                                                                                      |                |
| PD-L1                                              | NSCLC                                                                                                                                                            | scFv-4-1BB/CD3ζ                                                                                                                 | lentiviral            | ?                   | *total number is 1-2x10 <sup>6</sup> /kg                                                                                                                                      | phase 1   | *est. enrollment: 22<br>*cy+flu                                                                     |                                                               | NCT03330834;<br>recruiting;<br>PI: Li Zhang                                       |           | Sun Yat-sen University, China                                                                                                                                      |                |
| PD-L1                                              | Recurrent glioblastoma multiforme                                                                                                                                | *Chimeric Switch receptor (CSR)<br>*PD1-CD28 (switches T cells on after binding to PD-L1 on tumor)<br>*tEGFR                    | ?                     | iv                  | *3+3 dose escalation<br>*5x10 <sup>4</sup> /kg-1x10 <sup>7</sup> /kg                                                                                                          | phase 1   | *est. enrollment: 20<br>*cy+flu                                                                     |                                                               | NCT02937844;<br>unknown;<br>PI: not provided                                      |           | Beijing Sanbo Brain Hospital, China                                                                                                                                |                |
| PSCA                                               | Metastatic castration resistant prostate cancer                                                                                                                  | *scFv-4-1BB/CD3ζ<br>*tCD19                                                                                                      | virally transduced    | iv                  | dose-escalation                                                                                                                                                               | phase 1   | *est. enrollment: 33<br>*cy+flu                                                                     |                                                               | NCT03873805;<br>recruiting;<br>PI: Tanya B Dorff                                  |           | City of Hope Medical Center, USA                                                                                                                                   |                |
| PSCA                                               | Selected advanced solid tumors:<br>*pancreatic,<br>*stomach,<br>*prostate cancers                                                                                | *scFv-CD28/CD3ζ<br>*CAR-T have iMC                                                                                              | retroviral            | ?                   | MTD escalating dosis: from 1.25x10 <sup>6</sup> cells/kg up to 5.0x10 <sup>6</sup> cells/kg                                                                                   | phase 1/2 | *est. enrollment: 30<br>*cy+flu                                                                     | 8/15 SD, 3/15 PD                                              | NCT02744287;<br>recruiting;<br>PI: Carlos Becerra                                 | [207]     | Baylor health care system, USA                                                                                                                                     |                |
| PSMA                                               | Refractory castrate-resistant prostate cancer                                                                                                                    | ?                                                                                                                               | lentiviral            | iv                  | *3+3 dose escalation<br>*cohort 1: single dose 0.5-1x10 <sup>7</sup> /kg<br>*cohort 2: single dose 3-6x10 <sup>7</sup> /kg                                                    | phase 1   | *est. enrollment: 12<br>*cy+flu                                                                     |                                                               | NCT04053062;<br>recruiting;<br>PI: Shancheng Ren                                  |           | Changhai Hospital, China                                                                                                                                           |                |
| PSMA                                               | Metastatic castration-resistant prostate cancer                                                                                                                  | Dominant negative TGFβ receptor                                                                                                 | genetically modified? | iv                  | ?                                                                                                                                                                             | phase 1   | *est. enrollment: 18<br>*cy+flu                                                                     |                                                               | NCT04227275;<br>recruiting;<br>PI: ?                                              |           | *Columbia University Medical Center, New York<br>*Thomas Jefferson University, Philadelphia, USA                                                                   |                |
| PSMA                                               | Metastatic castration-resistant prostate cancer                                                                                                                  | *P-PSMA-101 CAR<br>*CARTyrin (nanobody (Centyrin))-CD28/CD3ζ<br>*In Tscm (stem cell memory) cells<br>*iCasp9                    | PiggyBac transposon   | iv                  | *3 + 3 design of dose-escalating cohorts of single and multiple doses                                                                                                         | phase 1/2 | *est. enrollment: 40<br>*Drug: Rimiducid (safety switch activator)<br>*lymphodepleting chemotherapy |                                                               | NCT04249947;<br>recruiting;<br>PI: Matthew Spear                                  |           | *City of Hope Comprehensive Cancer Center, Duarte, USA<br>*Sarah Cannon Research Institute at HealthONE Denver<br>*Memorial Sloan Kettering Cancer Center New York |                |

| Antigen                                                 | Cancer                                                                                           | CAR type /add-ons                                                               | CAR transfer          | Mode of injection                     | Number of cells                                                                                                                                                                   | Phase         | Patient # /pretreatment /other drugs                                                                                                                     | Outcome                                                                                                                    | NCT# /Status /PI                                                                            | Ref       | Origin                                                                                                                                                                                                                     | Adverse events                                                                                                                                                                                                                                                                                                                                                                                                      |
|---------------------------------------------------------|--------------------------------------------------------------------------------------------------|---------------------------------------------------------------------------------|-----------------------|---------------------------------------|-----------------------------------------------------------------------------------------------------------------------------------------------------------------------------------|---------------|----------------------------------------------------------------------------------------------------------------------------------------------------------|----------------------------------------------------------------------------------------------------------------------------|---------------------------------------------------------------------------------------------|-----------|----------------------------------------------------------------------------------------------------------------------------------------------------------------------------------------------------------------------------|---------------------------------------------------------------------------------------------------------------------------------------------------------------------------------------------------------------------------------------------------------------------------------------------------------------------------------------------------------------------------------------------------------------------|
| PSMA                                                    | Castrate-resistant metastatic prostate cancer                                                    | *scFv-CD28/CD3ζ<br>*scFv based on J591                                          | retroviral            | ?                                     | DLT<br>DL1: 1x10 <sup>7</sup> CAR+ T cells/kg<br>DL2: 3x10 <sup>7</sup> CAR+ T cells/kg<br>DL3: 1x10 <sup>8</sup> CAR+ T cells/kg                                                 | phase 1       | *actual enrollment: 13<br>*single dose of cyclophosphamide                                                                                               |                                                                                                                            | NCT01140373;<br>active, not recruiting;<br>PI: Susan Slovin                                 |           | MSKCC, USA                                                                                                                                                                                                                 |                                                                                                                                                                                                                                                                                                                                                                                                                     |
| PSMA                                                    | Castrate-resistant prostate cancer                                                               | *2nd generation<br>*Dominant negative form of TGFβ receptor                     | lentiviral            | iv                                    | *3+3 dose escalation<br>*cohort 1: 1-3x10 <sup>7</sup> /m <sup>2</sup> without cyclo<br>*cohort 2: 1-3x10 <sup>9</sup> /m <sup>2</sup> without cyclo<br>*cohort 3: MTD with cyclo | phase 1       | *est. enrollment: 18<br>*with and without cyclophosphamide                                                                                               |                                                                                                                            | NCT03089203;<br>recruiting;<br>PI: Naomi Haas                                               | [195]     | Upenn, USA                                                                                                                                                                                                                 |                                                                                                                                                                                                                                                                                                                                                                                                                     |
| PSMA                                                    | Advanced prostate cancer                                                                         | ?                                                                               | retroviral            | iv                                    | single dose 10 <sup>10</sup> -10 <sup>11</sup>                                                                                                                                    | phase 1       | *est. enrollment: 18<br>*non-myeloablative conditioning<br>*low or moderate IL-2                                                                         |                                                                                                                            | NCT00664196;<br>suspended (funding);<br>PI: Richard P Junghans                              |           | Roger Williams Medical Center, USA                                                                                                                                                                                         |                                                                                                                                                                                                                                                                                                                                                                                                                     |
| PSMA                                                    | Prostate cancer                                                                                  | *scFv-CD8hinge-CD3ζ<br>*scFv based on 3D8                                       | retroviral            | iv                                    | single dose 10 <sup>9</sup> or 10 <sup>10</sup>                                                                                                                                   | phase 1       | *est. enrollment: 12<br>*non-myeloablative conditioning cy+flu<br>*low or moderate IL-2                                                                  | 2/5 PR but relapsed after 1-2 months, 1/5 minor response, 2/5 NR                                                           | NCT01929239;<br>suspended (funding);<br>PI: Richard P Junghans, PhD, MD                     | [245,246] | Roger Williams Medical Center, USA                                                                                                                                                                                         | *Grade 3/4 hematologic toxicities including neutropenia, neutropenic fever, and thrombocytopenia in all the patients; anemia, hypocalcemia, hypophosphatemia, and appendicitis in one patient.<br>*Grade 1/2 skin rash, fatigue, intermittent low-grade fevers, and muscle pain in some patients.<br>*On-target/off-tumor toxicity: no                                                                              |
| PSMA                                                    | PSMA+ tumors:<br>*prostate,<br>*brain tumor,<br>*neuroblastoma                                   | 4SCAR                                                                           | ?                     | iv                                    | 10 <sup>6</sup> cells/kg                                                                                                                                                          | phase 1/2     | *est. enrollment: 100                                                                                                                                    |                                                                                                                            | NCT04429451;<br>recruiting;<br>PI: ?                                                        |           | *Shenzhen Children's Hospital<br>*Shenzhen Geno-immune Medical Institute<br>*Shenzhen Hospital of Southern Medical University<br>*The Seventh Affiliated Hospital of Sun Yat-Sen<br>*University Shenzhen, Guangdong, China |                                                                                                                                                                                                                                                                                                                                                                                                                     |
| ROR1                                                    | Advanced ROR1+ malignancies:<br>*CLL, MCL, ALL,<br>*NSCLC,<br>*TNBC                              | scFv-4-1BB/CD3ζ                                                                 | genetically modified? | iv                                    | dose escalation<br>3.3x10 <sup>5</sup> -1x10 <sup>7</sup> cells/kg                                                                                                                | phase 1       | *est. enrollment: 60<br>*cy+flu                                                                                                                          | AACR 2018: 4/5 MR (2 NSCLC, 2 TNBC), 1/5 SD (TNBC)<br><br>San Antonio Breast Cancer Symposium (SABCS) 2018: 2/4 SD, 1/4 PR | NCT02706392;<br>Suspended (COVID19 Suspension);<br>PI: David Maloney                        | [247,248] | Fred Hutchinson Cancer Research Center, USA                                                                                                                                                                                |                                                                                                                                                                                                                                                                                                                                                                                                                     |
| ROR2                                                    | *Solid tumor<br>*Soft tissue sarcoma<br>*Gastric cancer<br>*Pancreatic cancer<br>*Bladder cancer | CCT301-59 CAR T                                                                 | ?                     | iv                                    | dose escalation<br>3+3<br>one dose<br>DL1: 1x10 <sup>6</sup> CAR+ T cells/kg<br>DL2: 3x10 <sup>6</sup> CAR+ T cells/kg<br>DL3: 1x10 <sup>7</sup> CAR+ T cells/kg                  | phase 1       | *est. enrollment: 18<br>*cy+flu                                                                                                                          |                                                                                                                            | NCT03960060;<br>recruiting;<br>PI: Yuhong Zhou                                              |           | Shanghai Zhongshan Hospital, China                                                                                                                                                                                         |                                                                                                                                                                                                                                                                                                                                                                                                                     |
| VEGFR2                                                  | *Metastatic melanoma<br>*Renal cancer                                                            | ?                                                                               | retroviral            | iv                                    | MTD determination<br>Dose escalation:<br>1x10 <sup>6</sup> -3x10 <sup>10</sup> cells                                                                                              | phase 1/2     | *actual enrollment: 24<br>*lymphodepletion: cy+flu<br>*CAR-T with aldesleukin (IL-2)<br><br>22 PD<br>1 SD (DL: 1x10 <sup>9</sup> cells (high dose IL-2)) | 0 CR1 PR (DL: 1x10 <sup>10</sup> cells (low dose IL-2))<br>22 PD<br>1 SD (DL: 1x10 <sup>9</sup> cells (high dose IL-2))    | NCT01218867;<br>Terminated (No objective responses were observed?);<br>PI: Steven Rosenberg |           | NCI, NIH, USA                                                                                                                                                                                                              | *Grade 3/4 toxicity include nausea, vomiting, hypoxia, and elevated levels of aspartate transaminase, alanine transaminase, and bilirubin<br>*23 recipients experienced blood and lymphatic system disorders.<br>*More than 4 participants suffered from gastrointestinal events.<br>*Two suffered from fever<br>*8 afflicted by fatigue.<br>*Seven suffered from dyspnea.<br>*Eight suffered from hypoalbuminemia. |
| c-MET/PD-L1                                             | HCC                                                                                              | ?                                                                               | lentiviral            | iv                                    | 3 injections<br>2x10 <sup>6</sup> /kg                                                                                                                                             | phase 1       | *est. enrollment: 50<br>*cy+flu or Bis-1-nitrosoarea+Etoposide+Arabinoside+cyclophosphamide                                                              |                                                                                                                            | NCT03672305;<br>not yet recruiting;<br>PI: Guozhong Ji                                      |           | Second affiliated hospital of nanjing medical university, China                                                                                                                                                            |                                                                                                                                                                                                                                                                                                                                                                                                                     |
| mesothelin, PSCA, CEA, HER2, MUC1, EGFRvIII, and other? | Pancreatic cancer                                                                                | ?                                                                               | ?                     | iv                                    | single dose 1x10 <sup>7</sup> /kg                                                                                                                                                 | early phase 1 | est. enrollment: 10                                                                                                                                      |                                                                                                                            | NCT03267173;<br>unknown;<br>PI: Wie Yunwei                                                  |           | First affiliated hospital of Harbin medical university, China                                                                                                                                                              |                                                                                                                                                                                                                                                                                                                                                                                                                     |
| GD2, PSMA, MUC1, mesothelin or other                    | Cervical cancer                                                                                  | ?                                                                               | ?                     | iv                                    | 1 infusion:<br>1x10 <sup>6</sup> -1x10 <sup>7</sup> cells/kg                                                                                                                      | phase 1/2     | *est. enrollment: 20                                                                                                                                     |                                                                                                                            | NCT03356795;<br>recruiting;<br>PI: Lung-Ji Chang                                            |           | Shenzhen Geno-Immune Medical Institute, China                                                                                                                                                                              |                                                                                                                                                                                                                                                                                                                                                                                                                     |
| CD133, GD2, MUC1, CD117 or other                        | Sarcoma                                                                                          | 4SCART                                                                          | ?                     | iv                                    | 1 infusion:<br>1x10 <sup>6</sup> -1x10 <sup>7</sup> cells/kg                                                                                                                      | phase 1/2     | *est. enrollment: 20                                                                                                                                     |                                                                                                                            | NCT03356782;<br>recruiting;<br>PI: Lung-Ji Chang                                            | [41]      | Shenzhen Geno-Immune Medical Institute, China                                                                                                                                                                              |                                                                                                                                                                                                                                                                                                                                                                                                                     |
| PSMA and folate receptor alpha (FRA)                    | Bladder cancer                                                                                   | 4SCART                                                                          | ?                     | ?                                     | ?                                                                                                                                                                                 | phase 1/2     | *est. enrollment: 20                                                                                                                                     |                                                                                                                            | NCT03185468;<br>recruiting;<br>PI: Lung-Ji Chang                                            |           | Shenzhen Geno-Immune Medical Institute, China                                                                                                                                                                              |                                                                                                                                                                                                                                                                                                                                                                                                                     |
| PD-L1 and CD80/86                                       | Refractory/relapsed NSCLC                                                                        | Zeushield Cytotoxic T Lymphocytes (Z-CTLs)                                      | ?                     | ?                                     | Dose level one: 1.0x10 <sup>5</sup> cells/kg<br>Dose level two: 1.0x10 <sup>6</sup> cells/kg<br>Dose level three: 1.0x10 <sup>7</sup> cells/kg                                    | early phase 1 | est. enrollment: 10                                                                                                                                      |                                                                                                                            | NCT03060343;<br>unknown;<br>PI: Yu Fenglei and Li Peng                                      |           | Second Xiangya Hospital of Central South University, China                                                                                                                                                                 |                                                                                                                                                                                                                                                                                                                                                                                                                     |
| GPC3, mesothelin, CEA                                   | hepatocellular carcinoma (GPC3)<br>pancreatic cancer (mesothelin)<br>colorectal cancer (CEA)     | ?                                                                               | lentiviral            | vascular interventional therapy or it | 1.25-4x10 <sup>7</sup> CAR+ T cells/cm <sup>3</sup> tumor bulk                                                                                                                    | phase 1/2     | *est. enrollment: 20                                                                                                                                     |                                                                                                                            | NCT02959151;<br>unknown;<br>PI: Wentao Li                                                   |           | Fudan University, China                                                                                                                                                                                                    |                                                                                                                                                                                                                                                                                                                                                                                                                     |
| ROR2 or AXL                                             | Stage IV renal cell carcinoma                                                                    | *CCT301-59 when ROR2 positive<br>*CCT301-38 when ROR2 negative but AXL positive | ?                     | iv                                    | dose escalation and expansion<br>3 doses will be tested:<br>1x10 <sup>5</sup> /kg<br>1x10 <sup>6</sup> /kg<br>1x10 <sup>7</sup> /kg CAR+ T cells                                  | phase 1/2     | *est. enrollment: 66<br>*cy+flu                                                                                                                          |                                                                                                                            | NCT03393936;<br>active, not recruiting;<br>PI: not provided                                 |           | Shanghai Sinobioway Sunterra Biotech, China                                                                                                                                                                                |                                                                                                                                                                                                                                                                                                                                                                                                                     |

| Antigen                                                                                                                                               | Cancer                                                                                                           | CAR type /add-ons                                                                                      | CAR transfer    | Mode of injection | Number of cells                                                                                                                                | Phase     | Patient # /pretreatment /other drugs             | Outcome | NCT# /Status /PI                                                 | Ref   | Origin                                                                                                                                                                                                                 | Adverse events |
|-------------------------------------------------------------------------------------------------------------------------------------------------------|------------------------------------------------------------------------------------------------------------------|--------------------------------------------------------------------------------------------------------|-----------------|-------------------|------------------------------------------------------------------------------------------------------------------------------------------------|-----------|--------------------------------------------------|---------|------------------------------------------------------------------|-------|------------------------------------------------------------------------------------------------------------------------------------------------------------------------------------------------------------------------|----------------|
| EGFRVIII, IL13Rα2, Her-2, EphA2, CD133, GD2                                                                                                           | Recurrent malignant glioma                                                                                       | ?                                                                                                      | lentiviral      | ?                 | ?                                                                                                                                              | phase 1   | est. enrollment: 100                             |         | NCT03423992; recruiting; PI: Qingtang Lin, Feng Ling             |       | Xuanwu Hospital, Beijing, China                                                                                                                                                                                        |                |
| CD19, BCMA, GPC3, CLD18.2                                                                                                                             | *B-cell leukemia/lymphoma, *myeloma, *HCC, *pancreatic carcinoma and *adenocarcinoma of esophagogastric junction | ?                                                                                                      | lentiviral      | iv                | 3+3 dose escalation                                                                                                                            | ?         | *est. enrollment: 48 *cy+flu                     |         | NCT03302403; recruiting; PI: Mengtao Zhou, Kang Yu, Songfu Jiang |       | FirstAffiliated Hospital of Wenzhou Medical University, China                                                                                                                                                          |                |
| HER2, mesothelin, Lewis-Y, PSCA, MUC1, PD-L1, CD80/86                                                                                                 | Lung cancer                                                                                                      | 3rd generation                                                                                         | transduction ?  | iv or it          | ?                                                                                                                                              | phase 1   | est. enrollment: 30                              |         | NCT03198052; recruiting; PI: Zhenfeng Zhang                      | [35]  | Second Affiliated Hospital of Guangzhou Medical University, China                                                                                                                                                      |                |
| MAGE-A1, MAGE-A4, MUC1, GD2, mesothelin, novel cancer antigens                                                                                        | Lung cancer                                                                                                      | ?                                                                                                      | lentiviral      | iv                | 1 infusion: 1x10 <sup>6</sup> -1x10 <sup>7</sup> cells/kg                                                                                      | phase 1/2 | *est. enrollment: 20                             |         | NCT03356808; recruiting; PI: Lung-Ji Chang                       |       | Shenzhen Geno-Immune Medical Institute, China                                                                                                                                                                          |                |
| NY-ESO-1, DR5, EGFRvIII, mesothelin                                                                                                                   | *Esophagus cancer *Hepatoma *Glioma *Gastric cancer                                                              | ?                                                                                                      | ?               | ?                 | ?                                                                                                                                              | phase 1/2 | *est. enrollment: 50 *cy + flu                   |         | NCT03941626; recruiting; PI: not provided                        |       | Henan Provincial Hospital Shenzhen BinDEBio Ltd., China                                                                                                                                                                |                |
| Transmembrane 4 L Six Family Member 1 (TM4SF1) or Epithelial cell adhesion molecule (EpCAM)                                                           | Refractory/recurrent advanced: *pancreatic cancer, *colorectal cancer, *gastric cancer or *lung cancer           | ?                                                                                                      | ?               | iv                | three escalating doses, 2.0-2.5, 4.0-5.0, and 8.0-10.0 (×10 <sup>6</sup> /kg)                                                                  | ?         | est. enrollment: 72                              |         | NCT04151186; not yet recruiting; PI: Helong Zhang                | [36]  | Suhaichuan, Tang-Du Hospital , China                                                                                                                                                                                   |                |
| CD19, CD22, CD33, BCMA, CD38, NY-ESO-1, DR5, c-Met, EGFRvIII, mesothelin                                                                              | Many different tumors incl. melanoma (target NY-ESO-1)                                                           | ?                                                                                                      | ?               | ?                 | ?                                                                                                                                              | phase 1/2 | *est. enrollment: 73 *cy+flu                     |         | NCT03638206; recruiting; PI: ZhongHua Yang                       |       | Shenzhen BinDEBio Ltd., China                                                                                                                                                                                          |                |
| Confirmed surface antigens including GD2, PSMA, Her2, CD276 or other markers                                                                          | *Sarcoma *Osteoid sarcoma *Ewing sarcoma                                                                         | CAR-T followed by sarcoma vaccines                                                                     | ?               | iv                | 1 infusion, CAR-T 1x10 <sup>6</sup> -1x10 <sup>7</sup> cells/kg iv and vaccine 1-5x10 <sup>6</sup> irradiated cells via subcutaneous injection | phase 1/2 | *est. enrollment: 20 *with low dose chemotherapy |         | NCT04433221; recruiting; PI: ?                                   |       | *The Seventh Affiliated Hospital, Sun Yat-Sen University *Shenzhen Children's Hospital *Shenzhen Geno-Immune Medical Institute, China                                                                                  |                |
| Cancer specimens positive for any one or more of tumor-associated antigens, such as GD2, mesothelin, P16, MMP, Melan A, MAGE A1, MAGE A3, and MAGE A4 | Cancer                                                                                                           | EIE (engineered immune effector) cells including chimeric antigen receptor (CAR) modified immune cells | ?               | iv, it            | ?                                                                                                                                              | phase 1/2 | est. enrollment: 100                             |         | NCT03535246; recruiting; PI: ?                                   |       | *QiFu Hospital of Guangzhou University of Chinese Medicine *Shenzhen Geno-immune Medical Institute *Yunnan Cancer Hospital & The Third Affiliated Hospital of Kunming Medical University & Yunnan Cancer Center, China |                |
| GD2, Her2, and CD44v6                                                                                                                                 | Breast cancer                                                                                                    | 4SCART (multiple)                                                                                      | ?               | iv                | ?                                                                                                                                              | phase 1/2 | *est. enrollment: 100                            |         | NCT04430595; recruiting; PI: ?                                   |       | *The Seventh Affiliated Hospital, Sun Yat-Sen University *Shenzhen Geno-Immune Medical Institute, China                                                                                                                |                |
| Undisclosed antigen                                                                                                                                   | Advanced, recurrent platinum resistant *ovarian, *fallopian tube or *primary peritoneal Cancer                   | *PRGN-3005 UltraCAR-T *membrane bound IL-15 *kill switch for better control                            | sleeping beauty | ip and iv         | *3+3 dose escalation                                                                                                                           | phase 1   | *est. enrollment: 41                             |         | NCT03907527; recruiting; PI: John Liao                           | [189] | *Fred Hutch *University of Washington Cancer Consortium, USA                                                                                                                                                           |                |
