# Supplementary material for: The Landscape of CAR-T Cell Clinical Trials against Solid Tumors—A Comprehensive Overview
Source: MDPI journal article supplement (doi:10.3390/cancers12092567), 2020-09-09
Supplement: s1 [file s1]

**Supplemental Table S2: Summary of clinical trials reporting on clinical outcome. Data was collected from clinicaltrials.gov and literature search on pubmed.ncbi.nlm.nih.gov.**

| NCT         | # patients | CR | PR | SD  | PD  | NE | NED | MR | undisclosed |
|-------------|------------|----|----|-----|-----|----|-----|----|-------------|
| NCT03349255 | 6          | 1  | 2  |     |     |    |     |    | 3           |
| NCT02541370 | 23         |    | 3  | 14  |     |    |     |    | 6           |
| NCT00006480 | 6          |    | 1  |     | 5   |    |     |    |             |
| NCT01373047 | 6          |    |    | 1   | 5   |    |     |    |             |
| NCT02349724 | 10         |    |    | 7   | 2   | 1  |     |    |             |
| NCT02416466 | 6          |    |    | 3   |     |    |     |    | 3           |
| NCT01212887 | 14         |    |    | 7   | 7   |    |     |    |             |
| NCT03159819 | 12         | 1  | 3  | 5   |     |    |     |    | 3           |
| NCT01837602 | 6          |    |    | 1   | 2   |    |     |    | 3           |
| NCT01869166 | 28         | 1  | 2  | 15  | 4   |    |     |    | 6           |
| NCT02209376 | 10         |    |    | 1   | 2   |    |     |    | 7           |
| NCT01818323 | 15         | 1  |    | 9   |     |    |     |    | 5           |
| NCT02107963 | 4          |    | 4  |     |     |    |     |    |             |
| NCT00085930 | 19         | 3  | 1  | 1   | 6   |    | 8   |    |             |
| NCT01460901 | 3          |    | 3  |     |     |    |     |    |             |
| NCT01822652 | 11         |    |    | 3   | 8   |    |     |    |             |
| NCT03146234 | 5          |    | 1  |     | 1   | 1  |     |    | 2           |
| NCT02395250 | 8          |    | 1  | 2   | 2   | 3  |     |    |             |
| NCT01935843 | 11         |    | 1  | 5   | 5   |    |     |    |             |
| NCT01109095 | 16         |    | 1  | 7   | 8   |    |     |    |             |
| NCT00902044 | 27         | 2  | 1  | 7   | 12  |    |     |    | 5           |
| NCT03054298 | 1          | 1  |    |     |     |    |     |    |             |
| NCT01583686 | 15         |    |    | 1   | 14  |    |     |    |             |
| NCT02159716 | 6          |    |    | 6   |     |    |     |    |             |
| NCT02414269 | 14         | 2  | 5  | 4   |     |    |     |    | 3           |
| NCT01355965 | 6          | 1  |    | 4   | 1   |    |     |    |             |
| NCT01897415 | 16         |    |    | 2   |     |    |     |    | 14          |
| NCT02587689 | 1          |    | 1  |     |     |    |     |    |             |
| NCT03310008 | 3          |    | 1  |     |     |    |     |    | 2           |
| NCT03018405 | 14         |    |    | 4   |     |    |     |    | 10          |
| NCT02744287 | 15         |    |    | 8   | 3   |    |     |    | 4           |
| NCT01929239 | 5          |    | 2  |     |     |    |     |    | 3           |
| NCT02706392 | 9          |    | 1  | 3   |     |    |     | 4  | 1           |
| NCT01218867 | 24         |    | 1  | 1   | 22  |    |     |    |             |
|             | 375        | 13 | 35 | 121 | 109 | 5  | 8   | 4  | 80          |

CR=complete response, PR=partial response, SD=stable disease, PD=progressive disease, NE=not evaluable, NED=no evidence of disease, MR=mixed response.
